# Supplementary material for: Natural Corynanthe-Type Cholinesterase Inhibitors from Malaysian Uncaria attenuata Korth.: Isolation, Characterization, In Vitro and In Silico Studies
Source: MDPI journal article supplement (doi:10.3390/metabo13030390), 2023-03-07
Supplement: s1 [file s1]

## Supplementary Materials

### **Natural Corynanthe-Type Cholinesterase Inhibitors from Malaysian *Uncaria attenuata* Korth.: Isolation, Characterization, *In vitro* and *In silico* Studies**

Nelson Jeng-Yeou Chear<sup>1†</sup>, Tan Ai Fein Ching-Ga<sup>1†</sup>, Kooi-Yeong Khaw<sup>2</sup>,  
Francisco León<sup>3</sup>, Wen-Nee Tan<sup>4</sup>, Siti R. Yusof<sup>1</sup>, Christopher R. McCurdy<sup>5</sup>,  
Vikneswaran Murugaiyah<sup>1,6\*</sup>, and Surash Ramanathan<sup>1\*</sup>

<sup>1</sup>*Centre for Drug Research, Universiti Sains Malaysia, 11800 Minden, Penang, Malaysia*

<sup>2</sup>*School of Pharmacy, Monash University Malaysia, 47500 Bandar Sunway, Selangor, Malaysia*

<sup>3</sup>*Department of Drug Discovery and Biomedical Sciences, College of Pharmacy, University of South Carolina, Columbia, SC 29201, United States*

<sup>4</sup>*Chemistry Section, School of Distance Education, Universiti Sains Malaysia, 11800 Minden, Penang, Malaysia*

<sup>5</sup>*Department of Medicinal Chemistry, College of Pharmacy, University of Florida, Gainesville, FL 32610, United States*

<sup>6</sup>*Discipline of Pharmacology, School of Pharmaceutical Sciences, Universiti Sains Malaysia, 11800 Minden, Penang, Malaysia.*

\*Corresponding authors:

Surash Ramanathan (PhD), Centre for Drug Research, Universiti Sains Malaysia, 11800 Minden, Penang, Malaysia. Email: srama@usm.my

Vikneswaran Murugaiyah (PhD), Centre for Drug Research, Universiti Sains Malaysia, 11800 Minden, Penang, Malaysia. Email: vicky@usm.my

† These authors equally contributed.

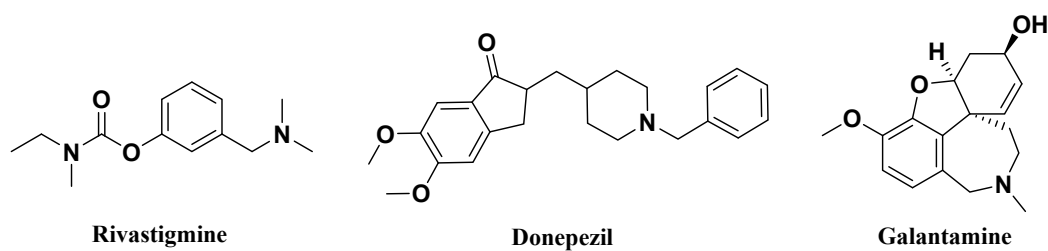

**Figure S1.** Examples of clinically approved cholinesterase inhibitors.

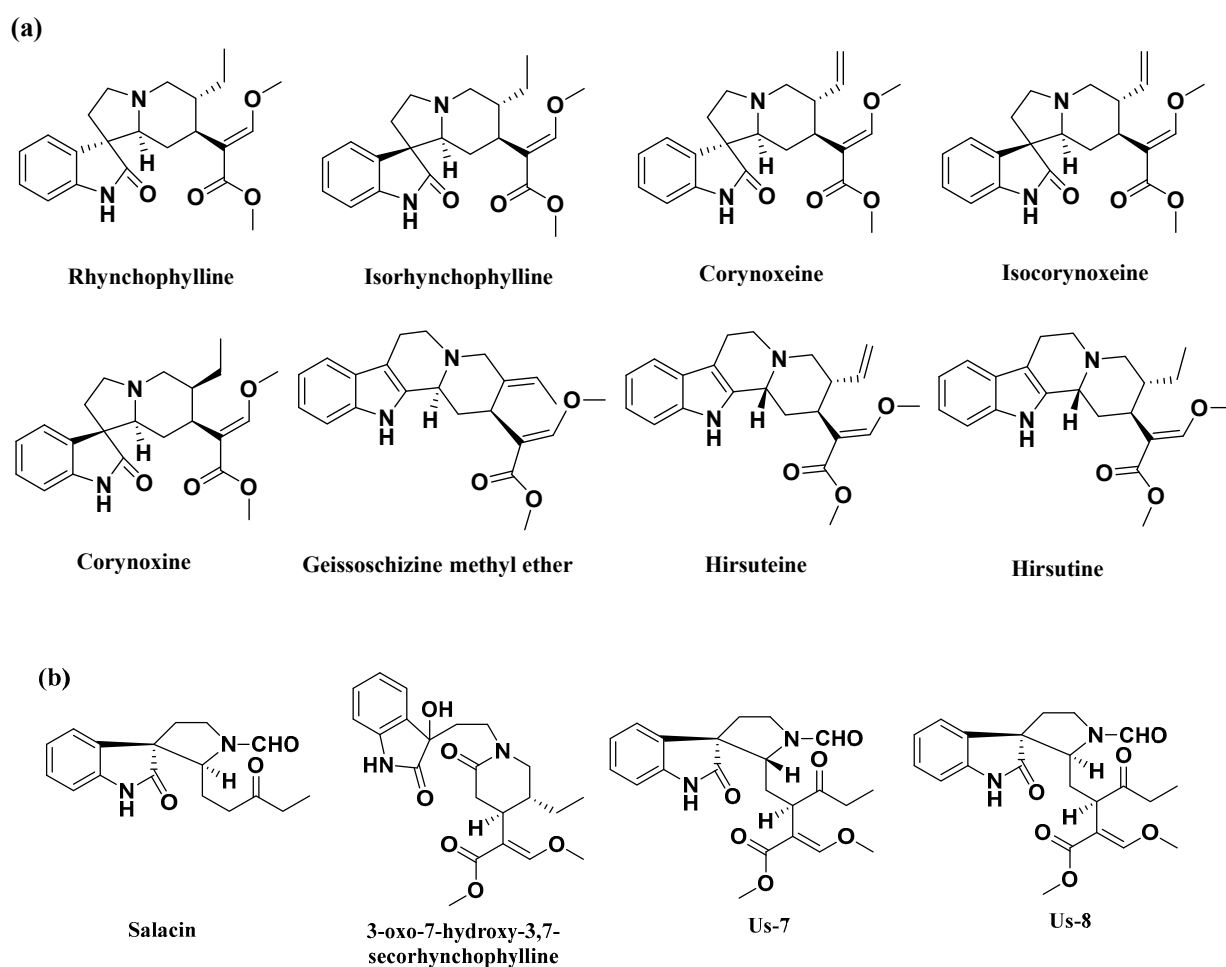

**Figure S2.** (a) Common corynanthe-type neuroprotective alkaloids found in *Uncaria* species; (b) Unusual D-secocorynanthe-type oxindole alkaloids from the stems and hooks of Thai *Uncaria attenuata*.

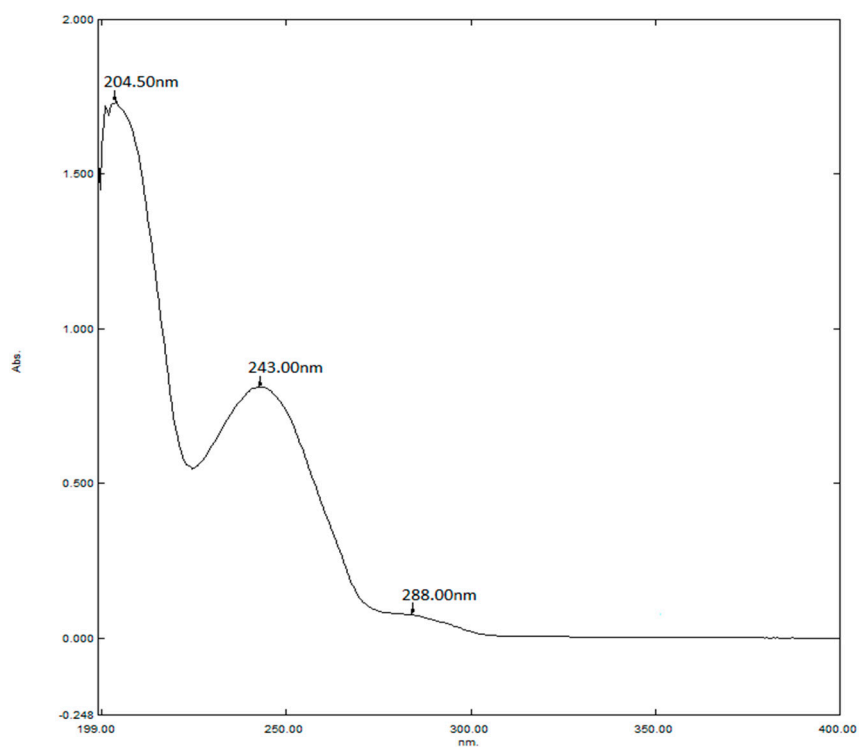

**Figure S3:** UV spectrum of compound (1) (MeOH).

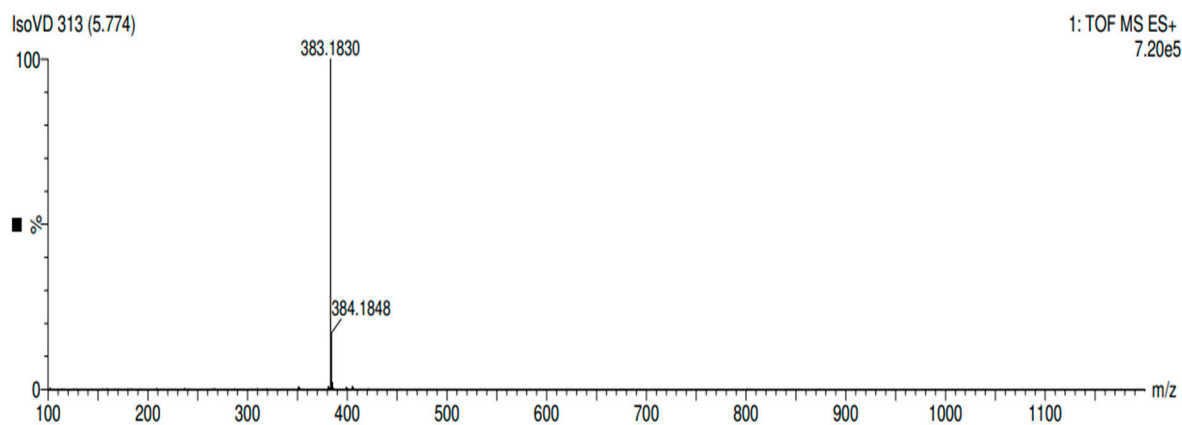

**Figure S4:** QToF-MS spectrum of compound (1) (positive mode).

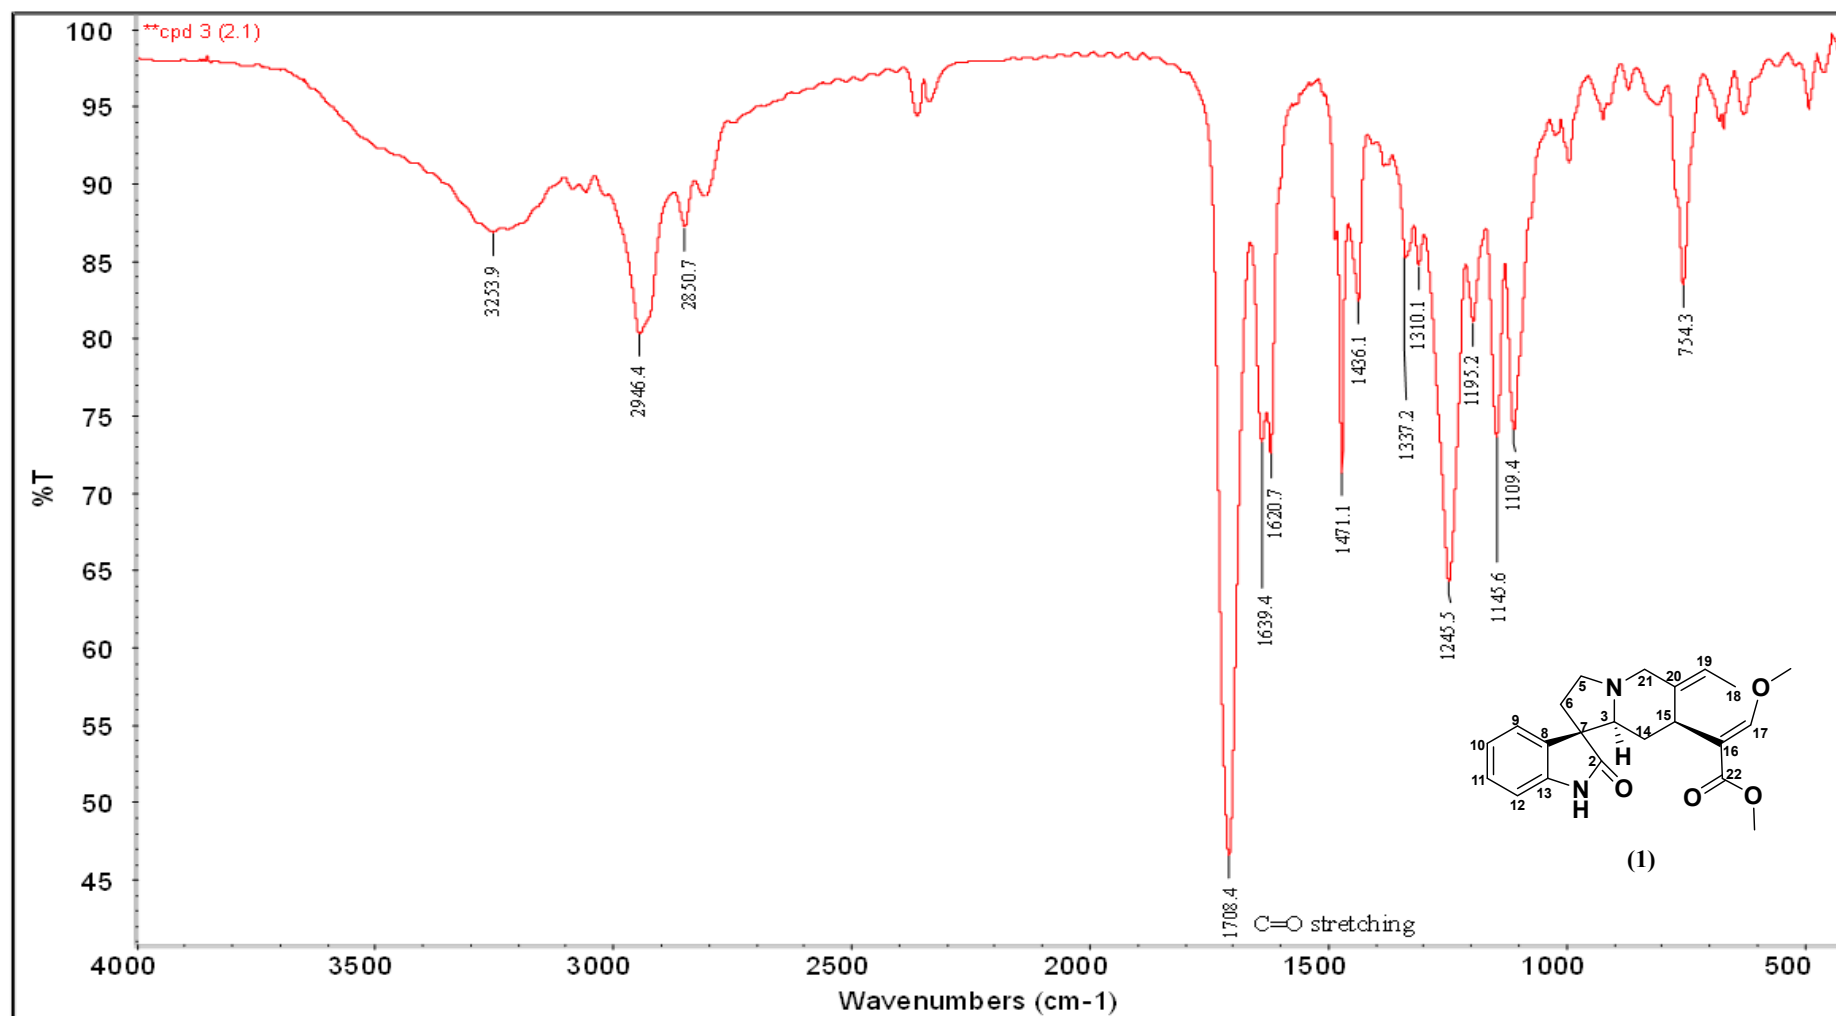

**Figure S5:** FTIR spectrum of compound (1) (KBr).

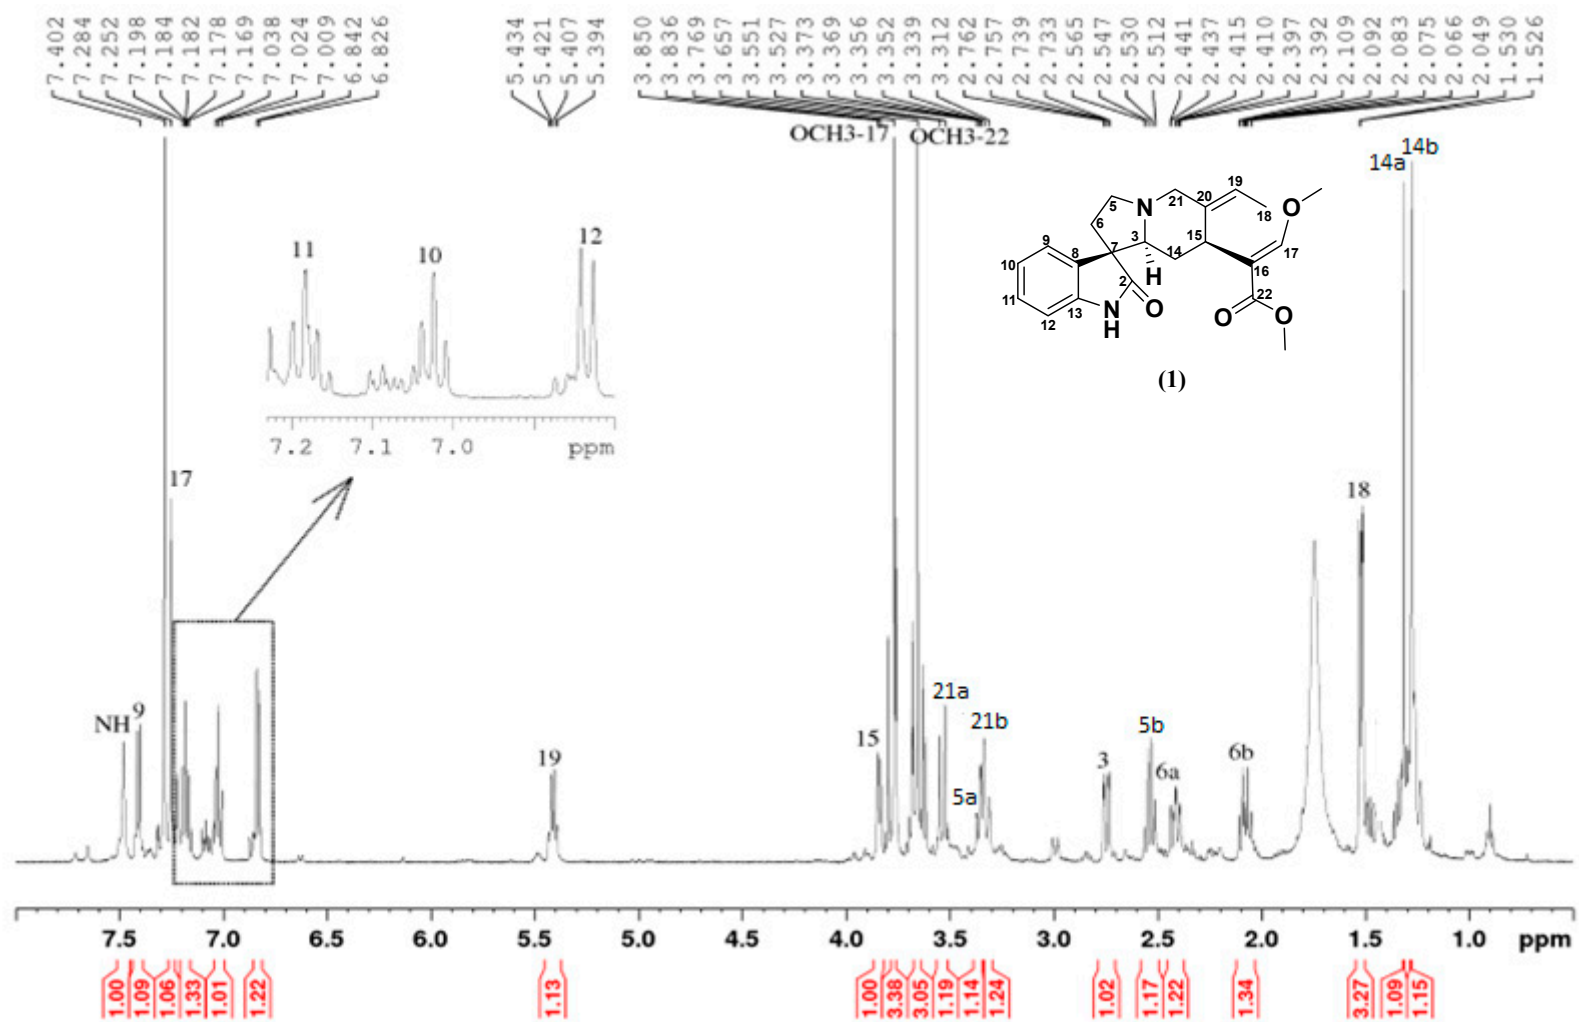

**Figure S6:** <sup>1</sup>H NMR spectrum of compound (1) (CDCl<sub>3</sub>, 500MHz).

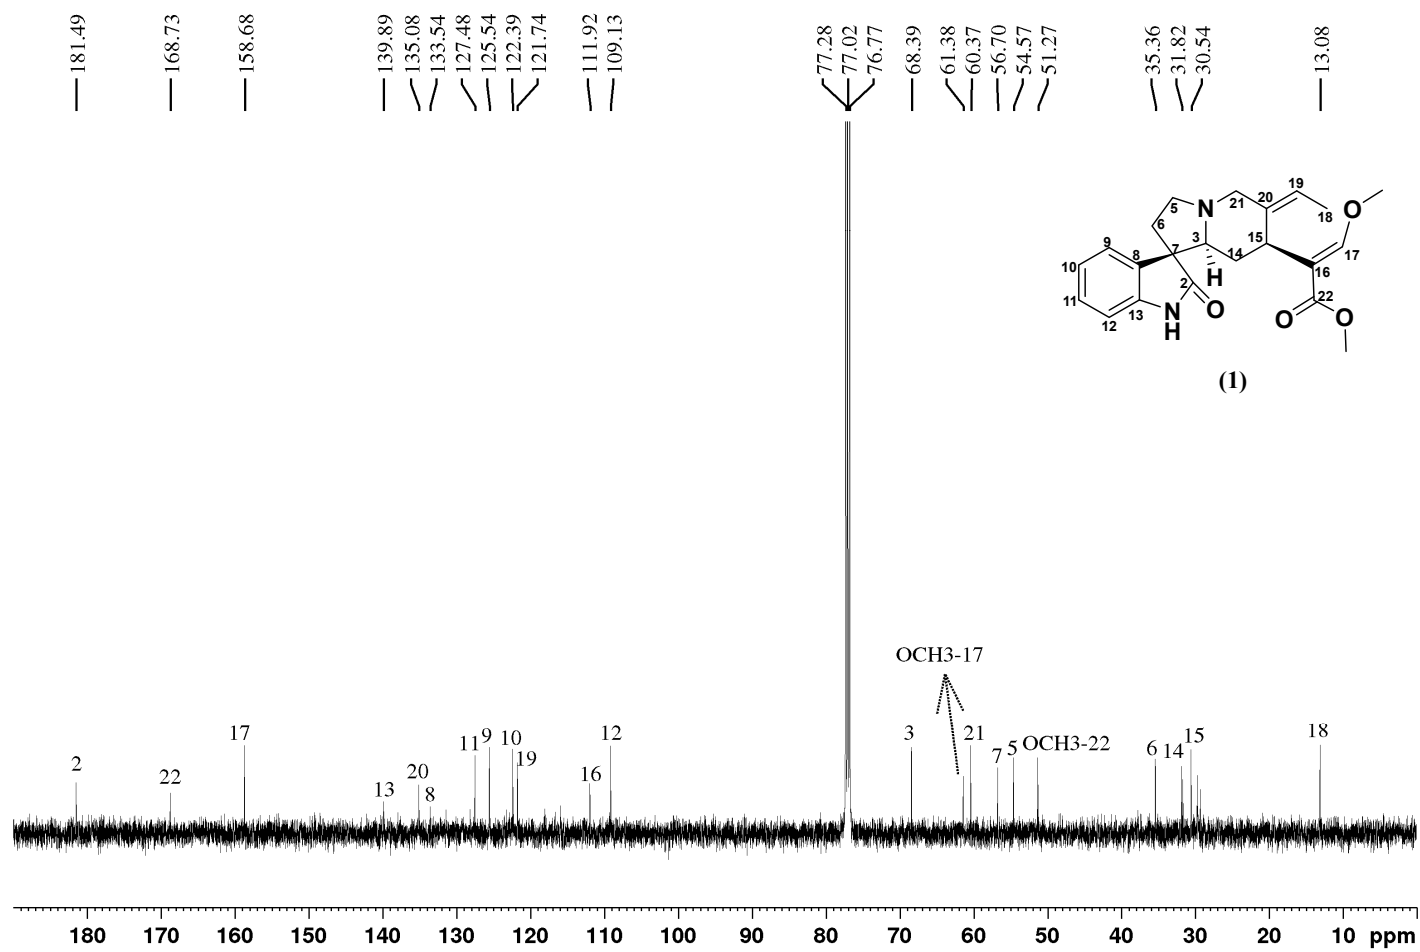

**Figure S7:**  $^{13}\text{C}$  NMR spectrum of compound (1) ( $\text{CDCl}_3$ , 125MHz).

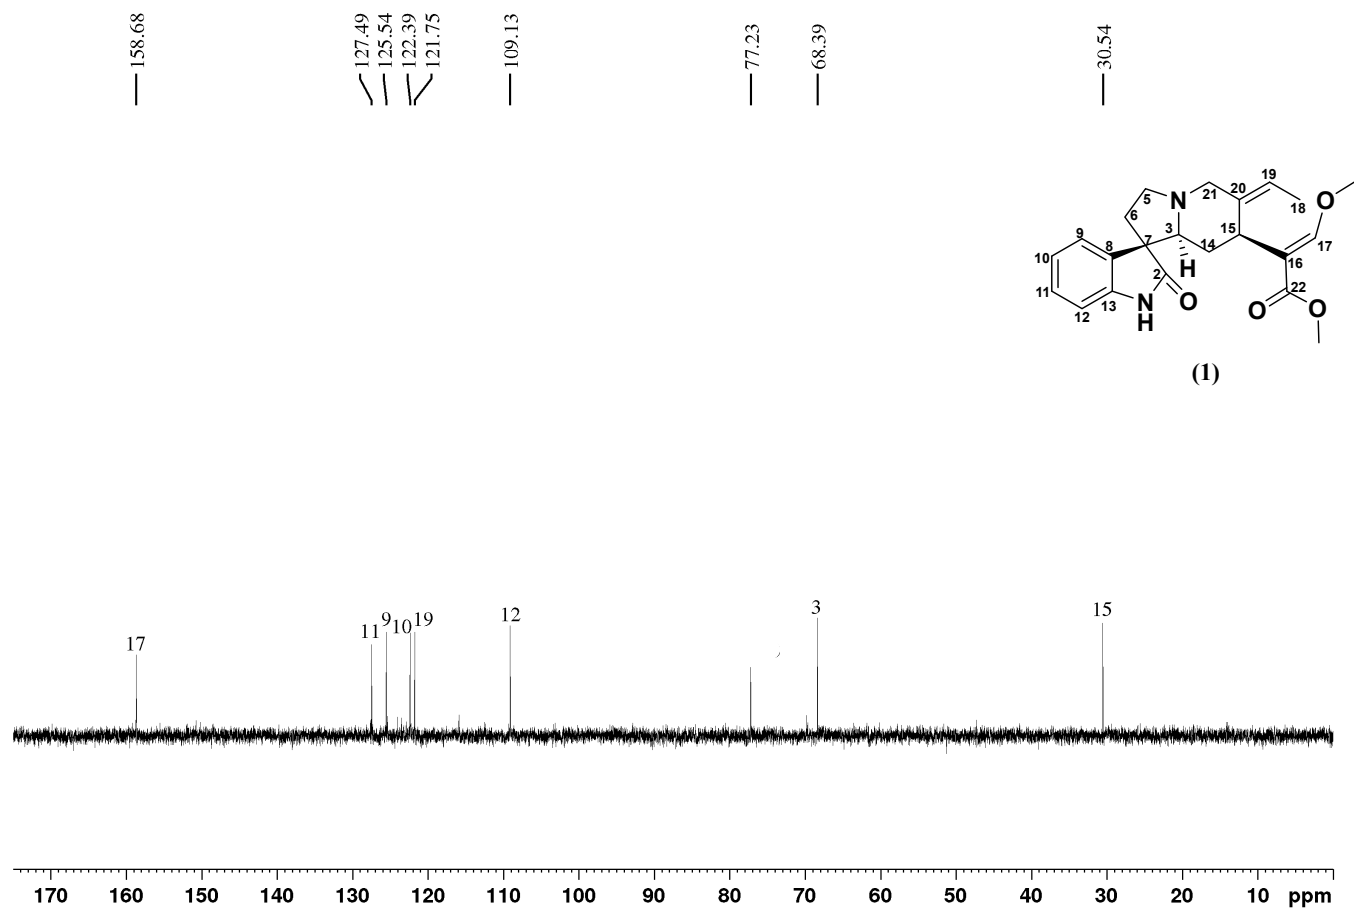

**Figure S8:** DEPT 90 spectrum of compound (1) (CDCl<sub>3</sub>, 125MHz).

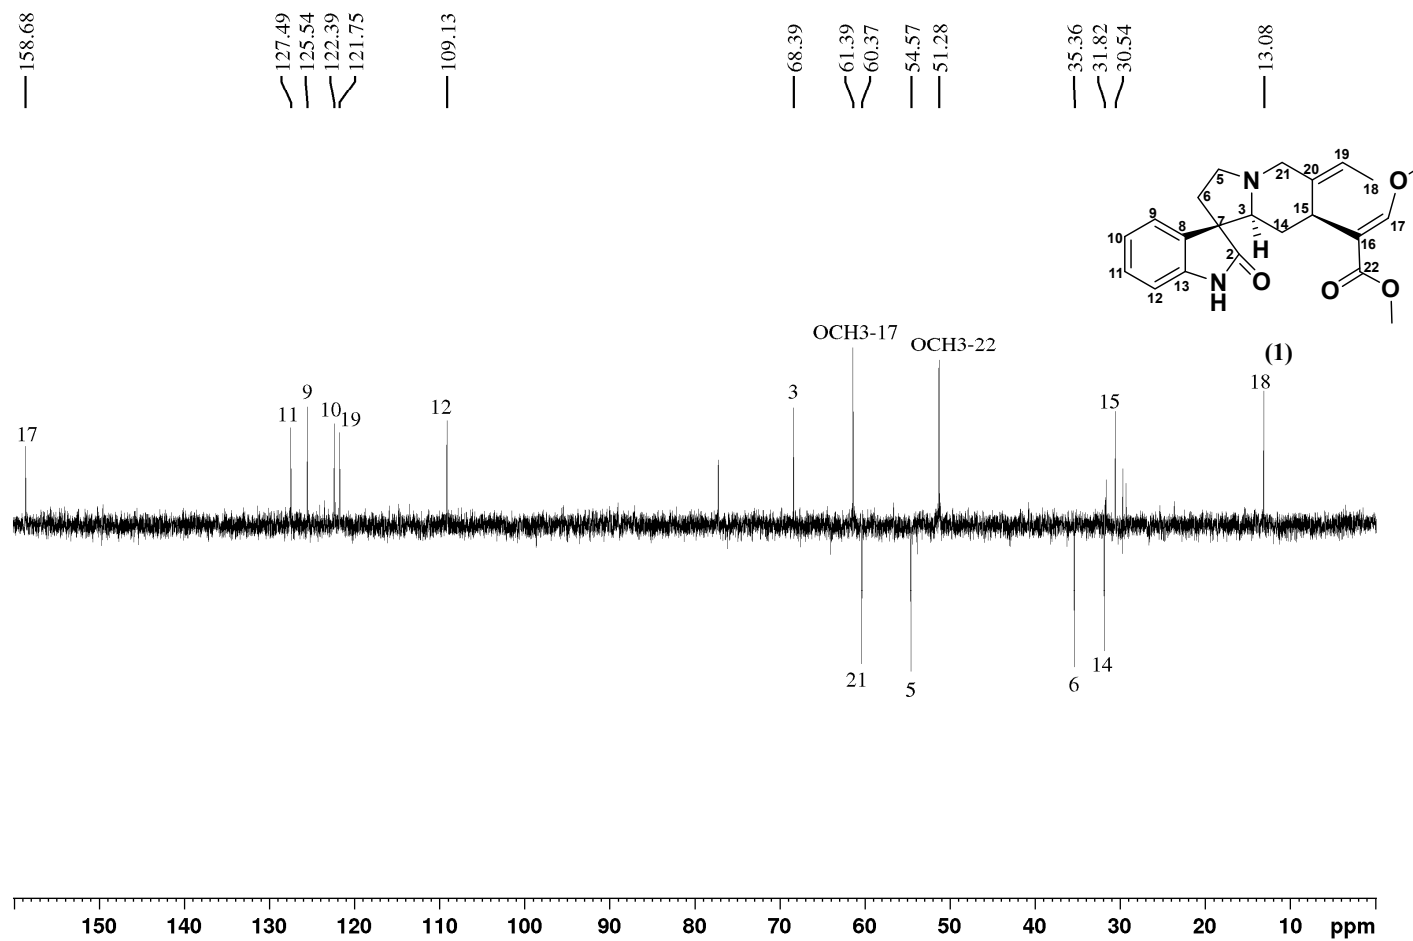

**Figure S9:** DEPT 135 spectrum of compound (1) (CDCl<sub>3</sub>, 125MHz).



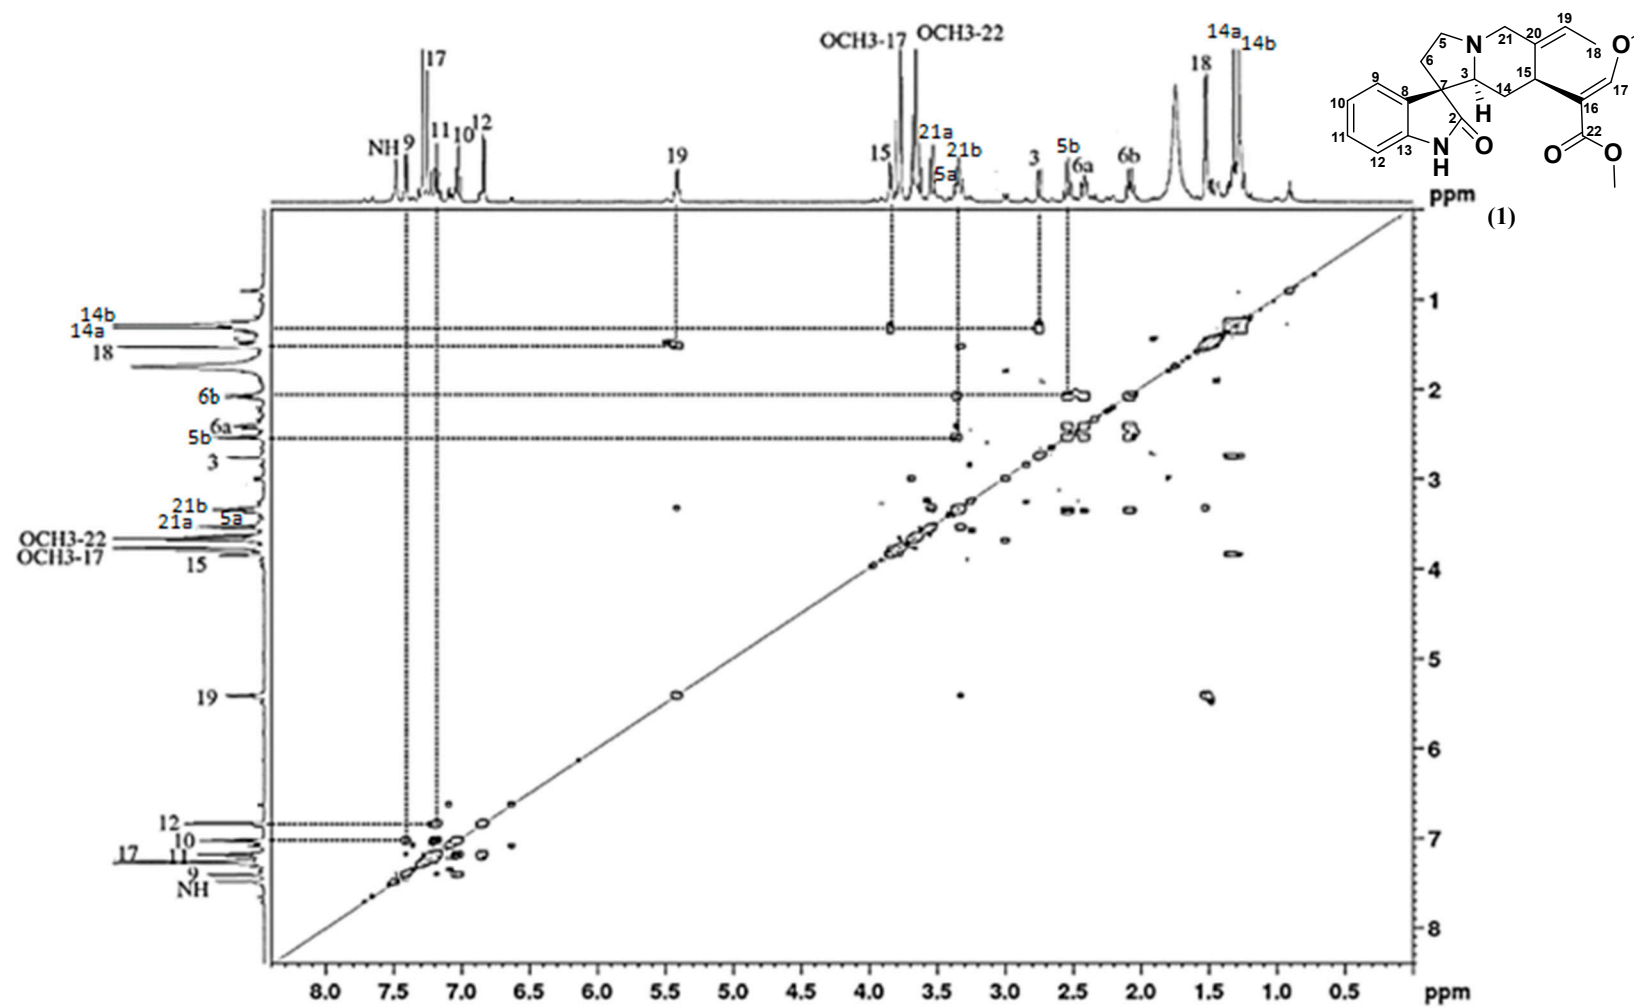

**Figure S10:** COSY spectrum of compound (1) (CDCl<sub>3</sub>, 500MHz).

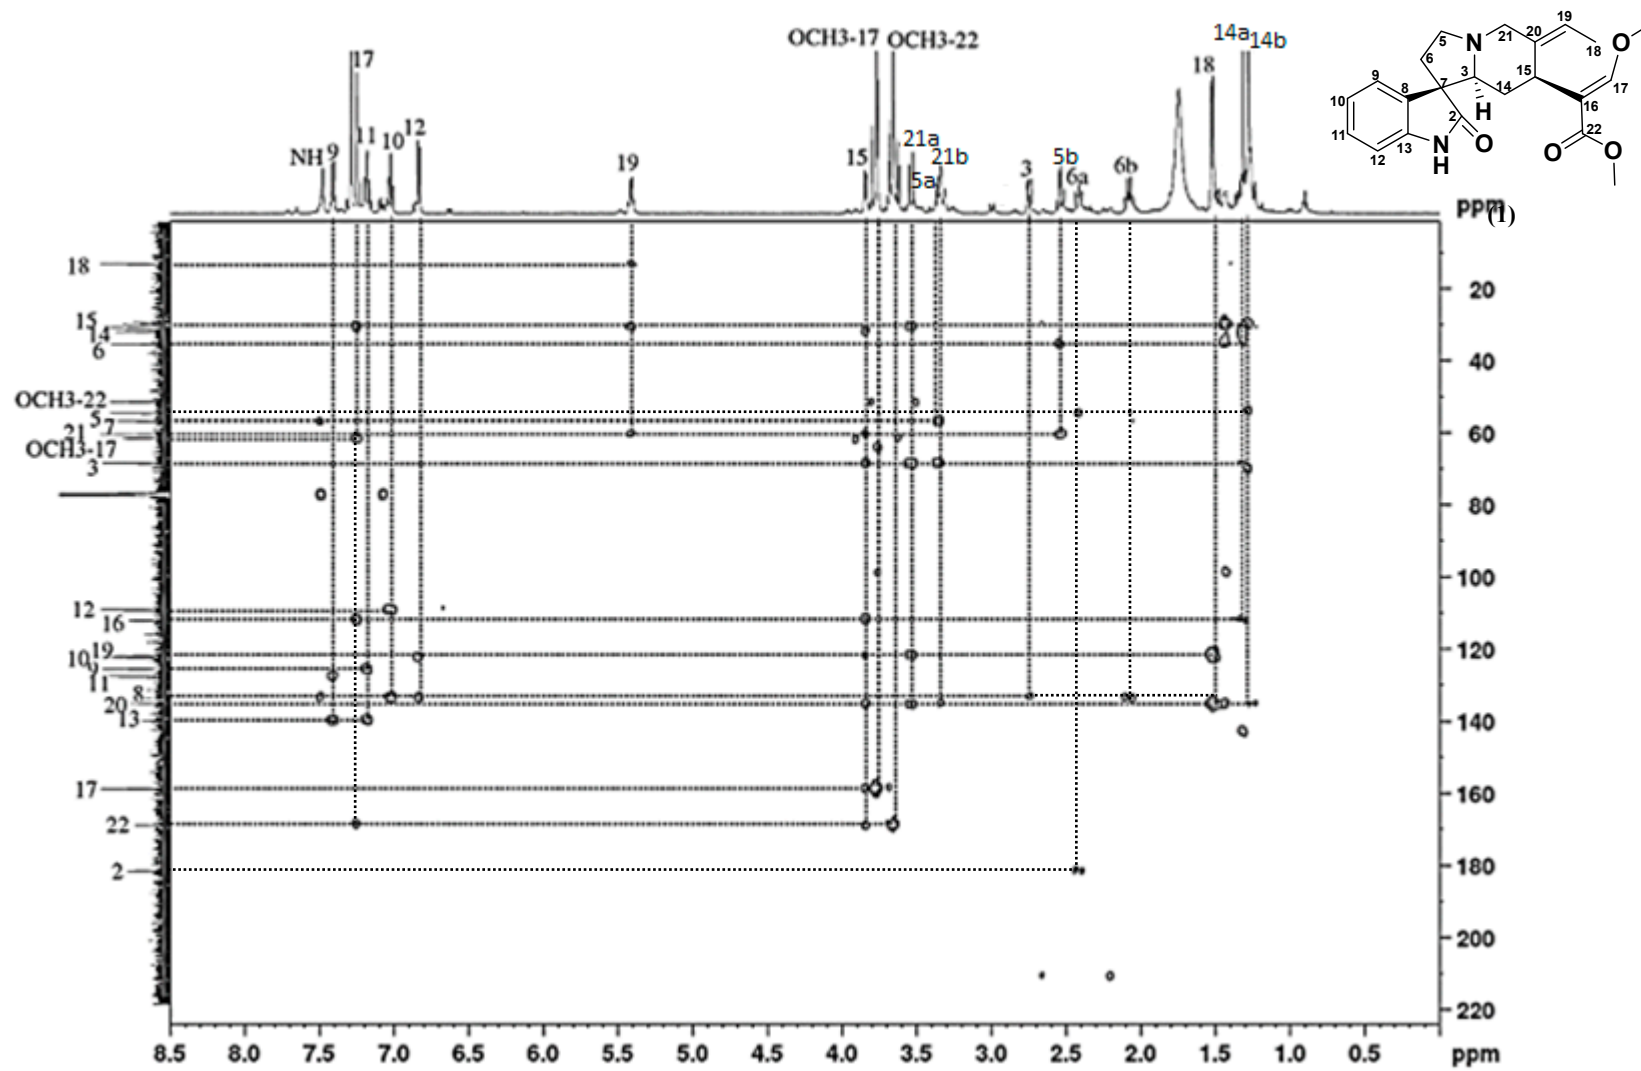

Figure S11: HMBC spectrum of compound (1) (CDCl<sub>3</sub>, 500MHz).

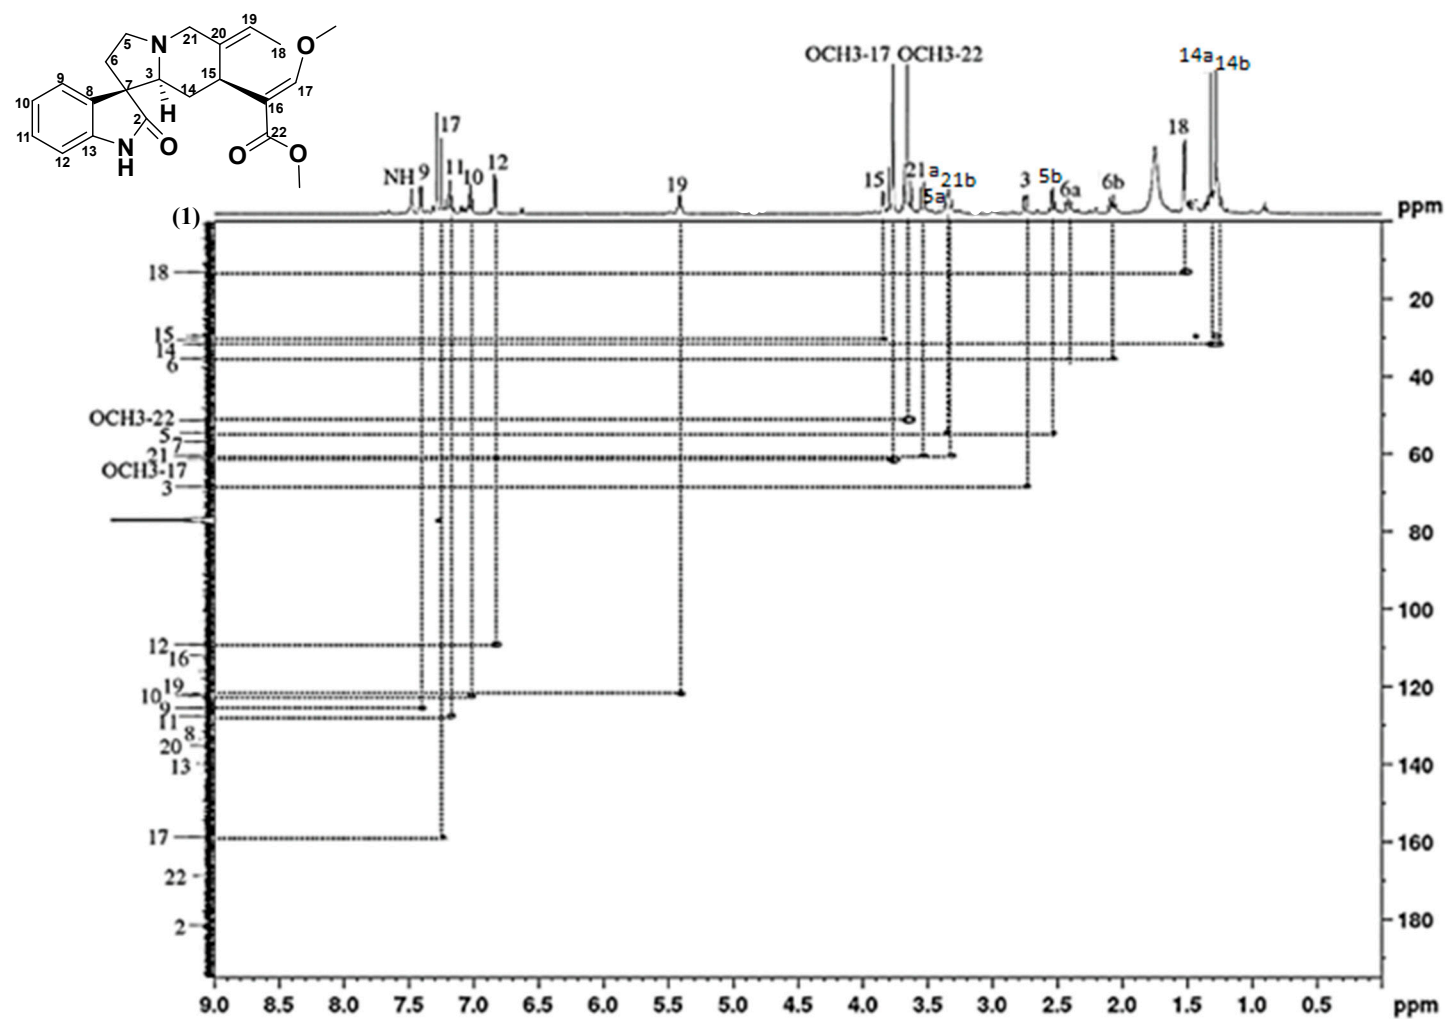

**Figure S12:** HSQC spectrum of compound (1) (CDCl<sub>3</sub>, 500MHz).

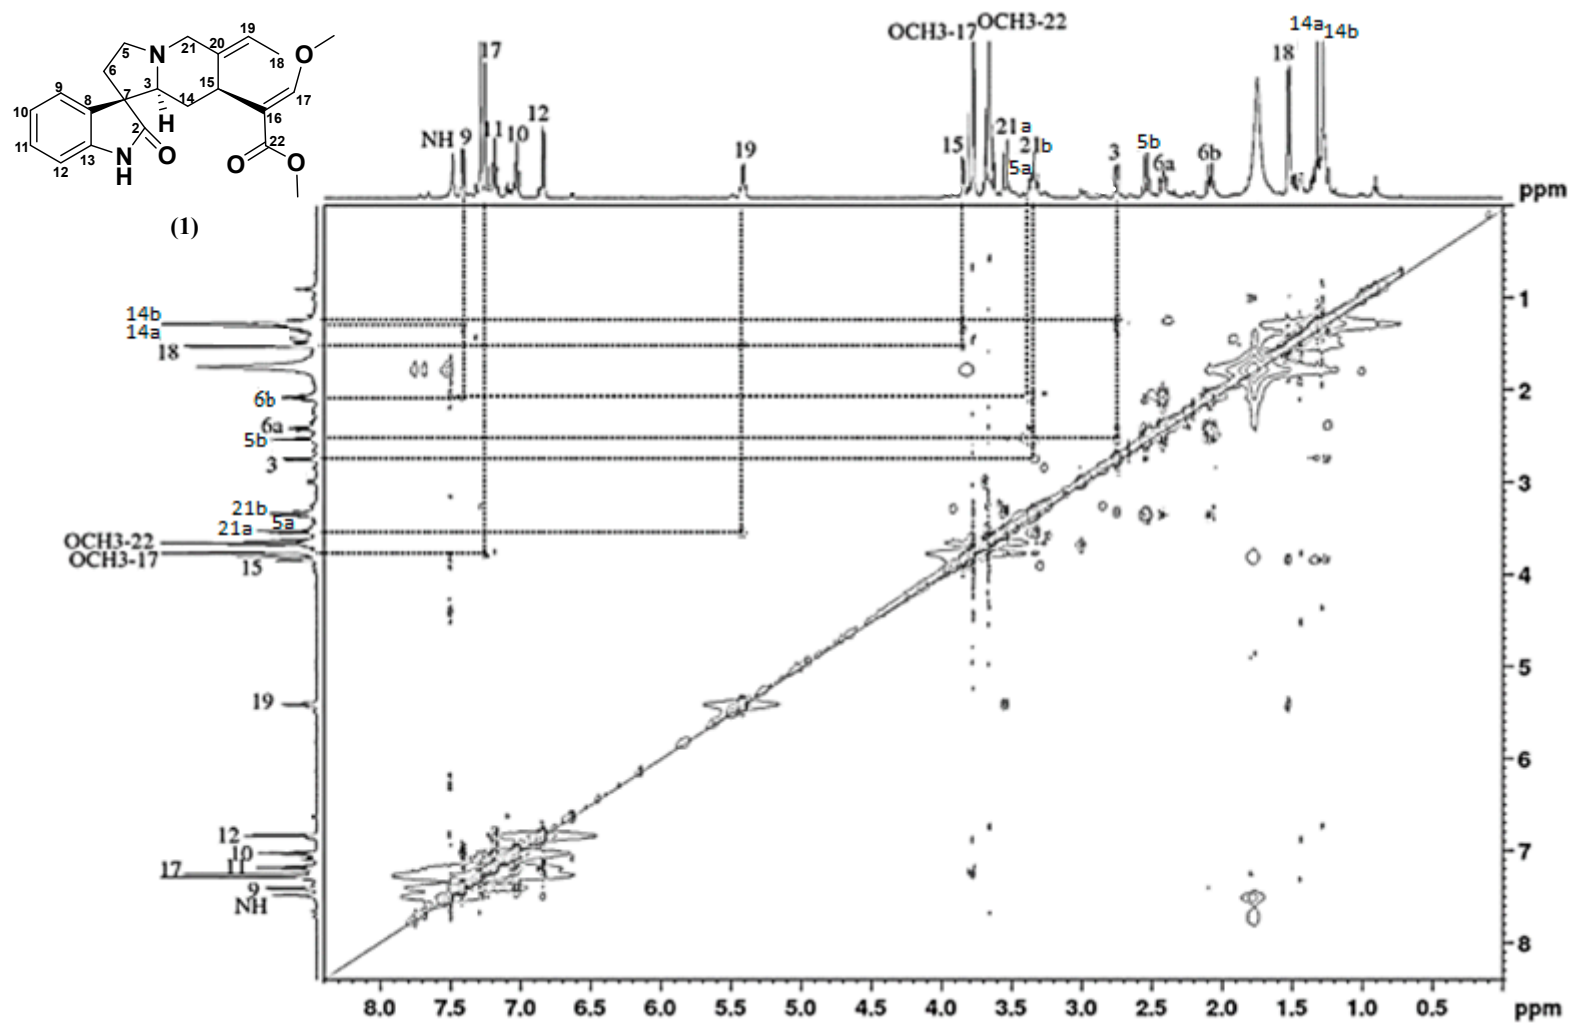

**Figure S13:** NOESY spectrum of compound (1) ( $\text{CDCl}_3$ , 500MHz).

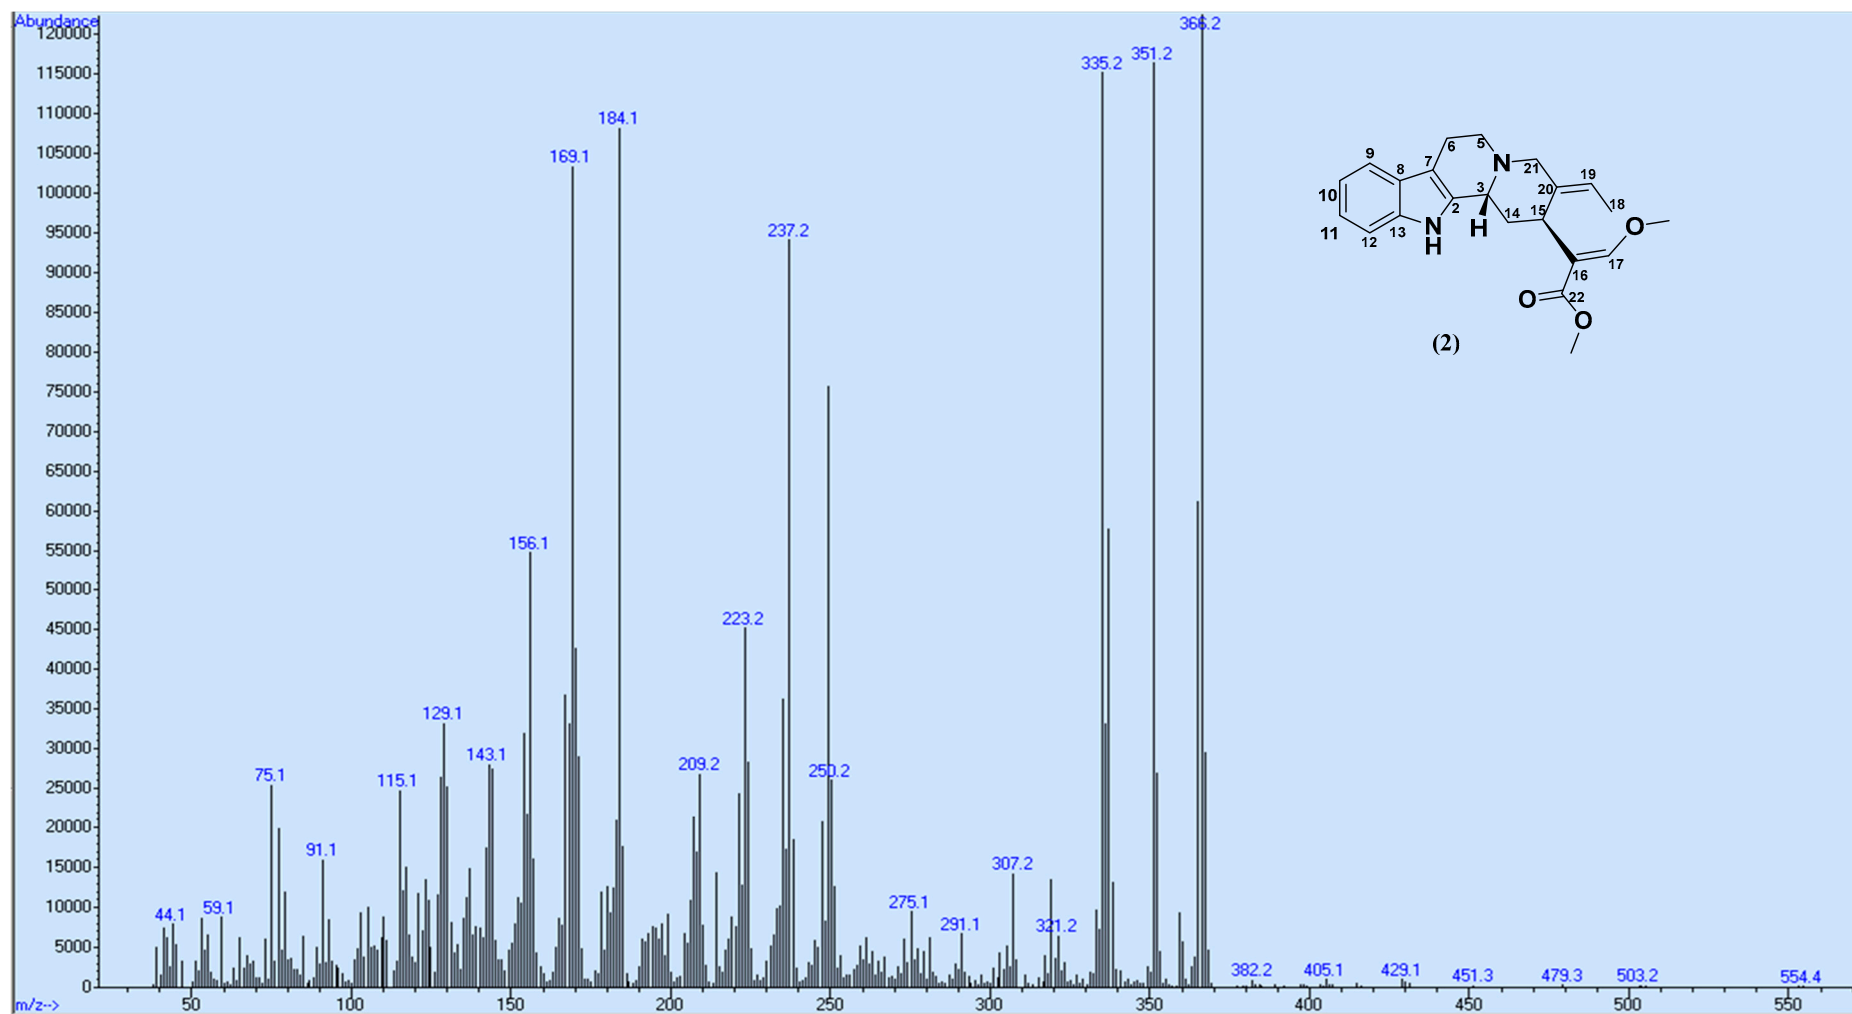

**Figure S14:** GC-EI-MS spectrum of compound (2).

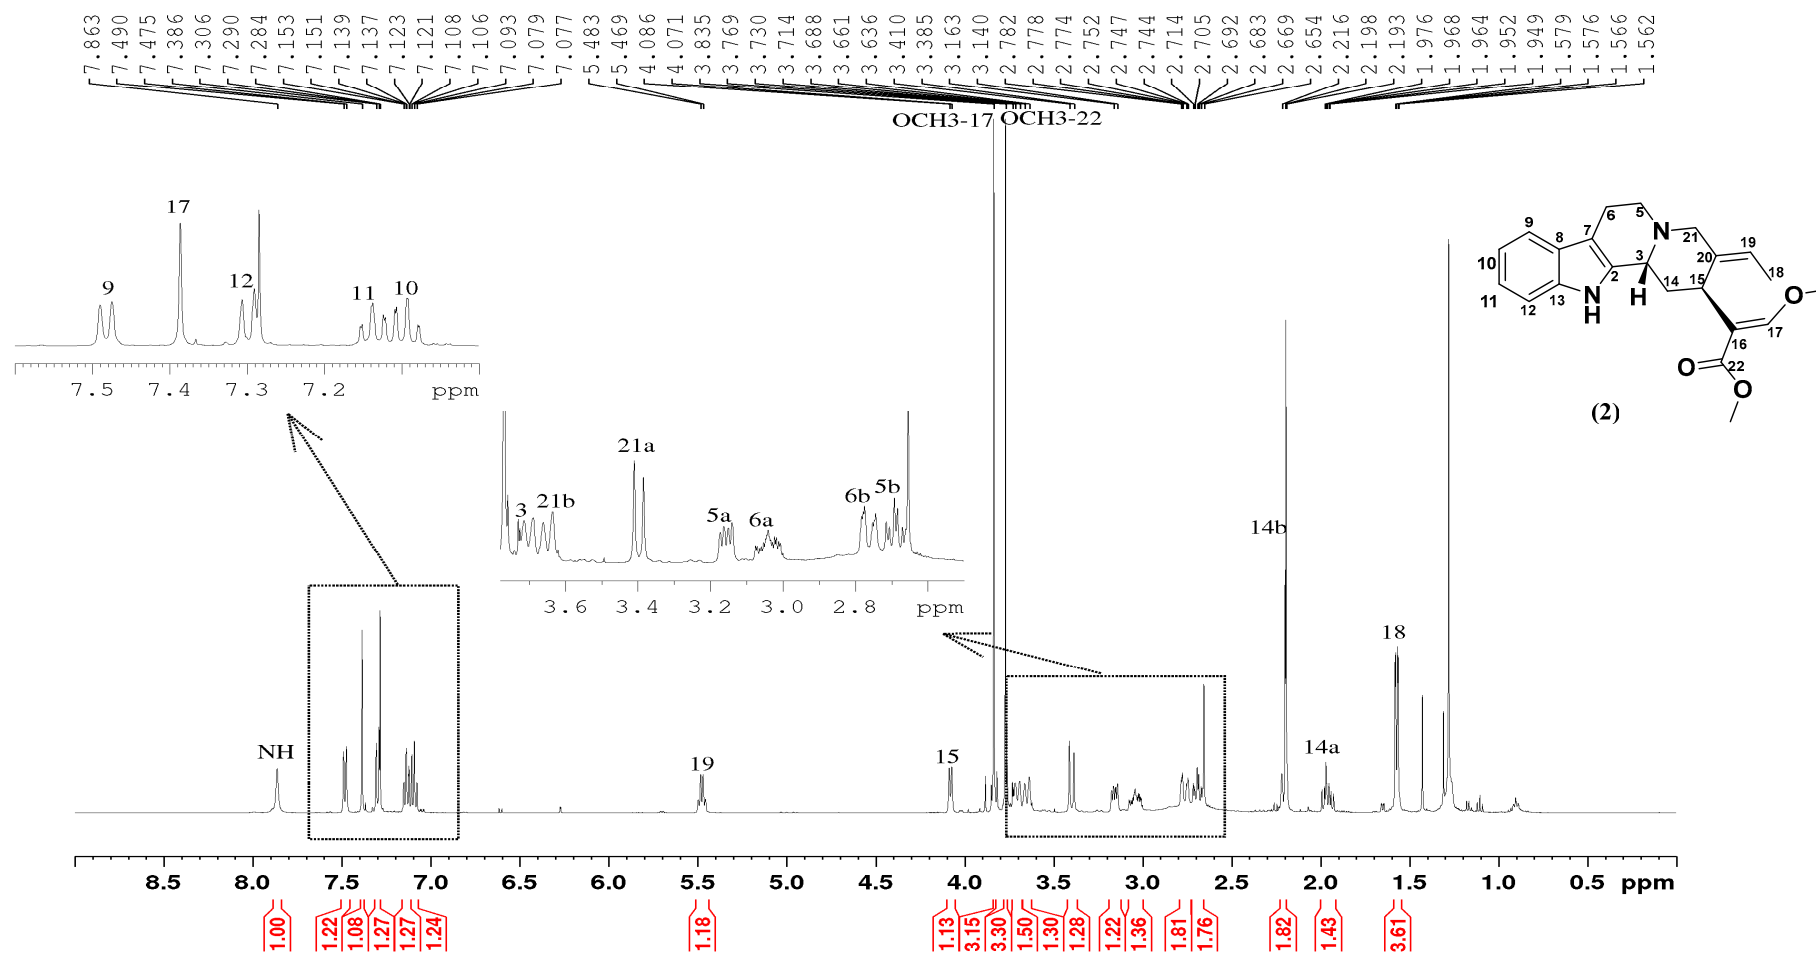

**Figure S15:**  $^1\text{H}$  NMR spectrum of compound (2) (500 MHz,  $\text{CDCl}_3$ ).

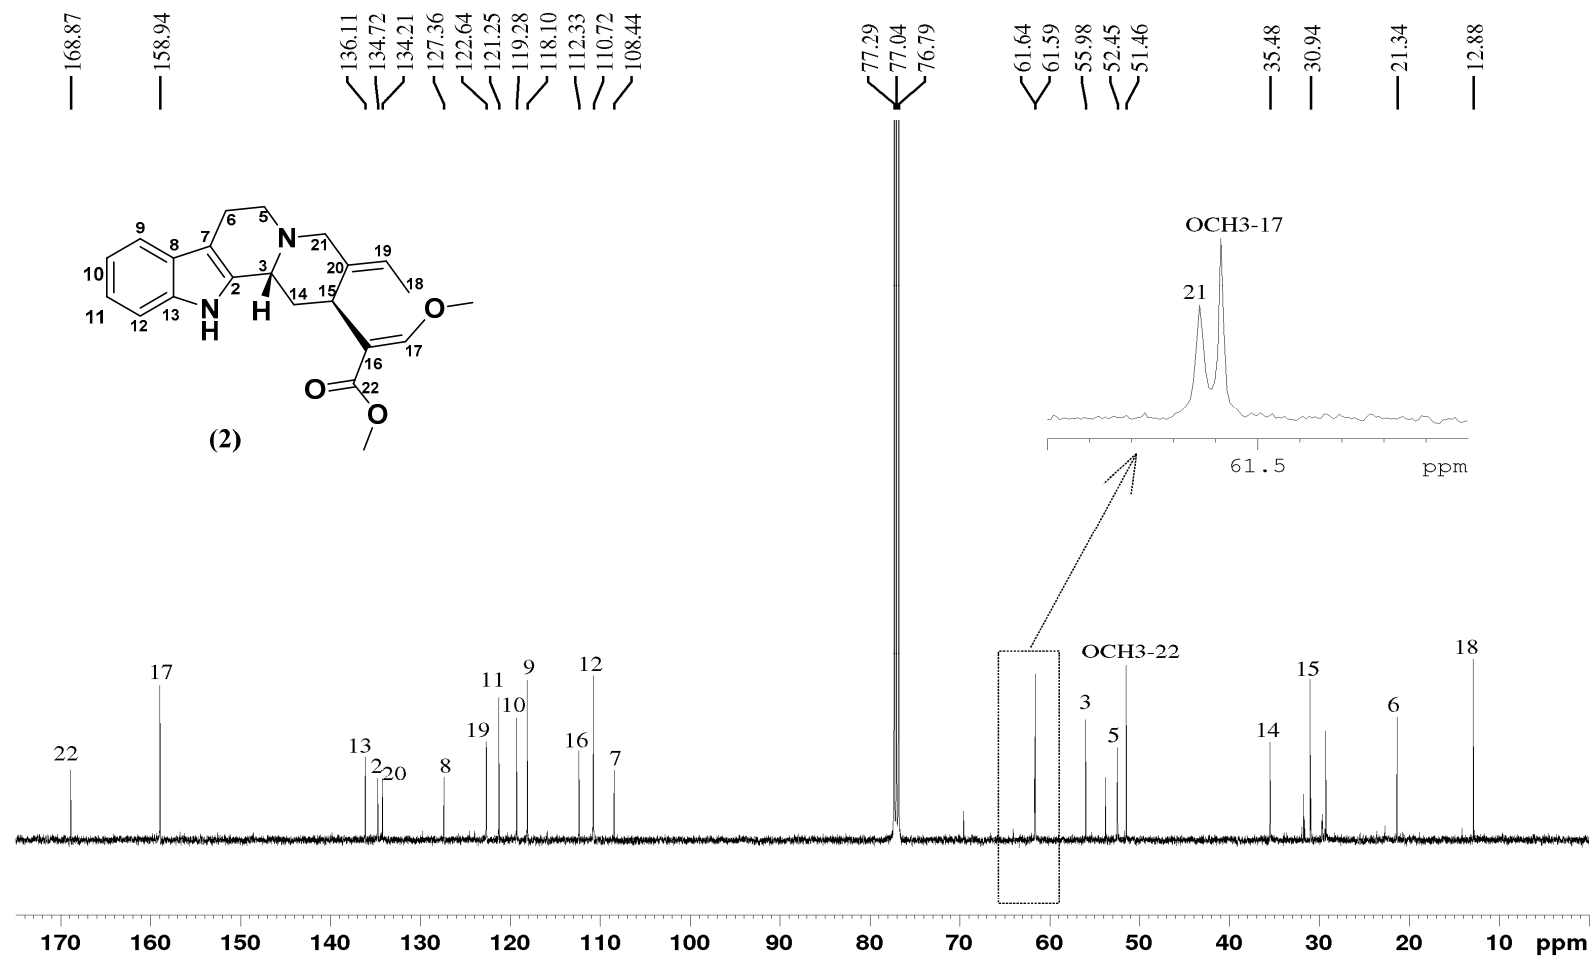

**Figure S16:**  $^{13}\text{C}$  NMR spectrum of compound (2) (CDCl<sub>3</sub>, 125 MHz).

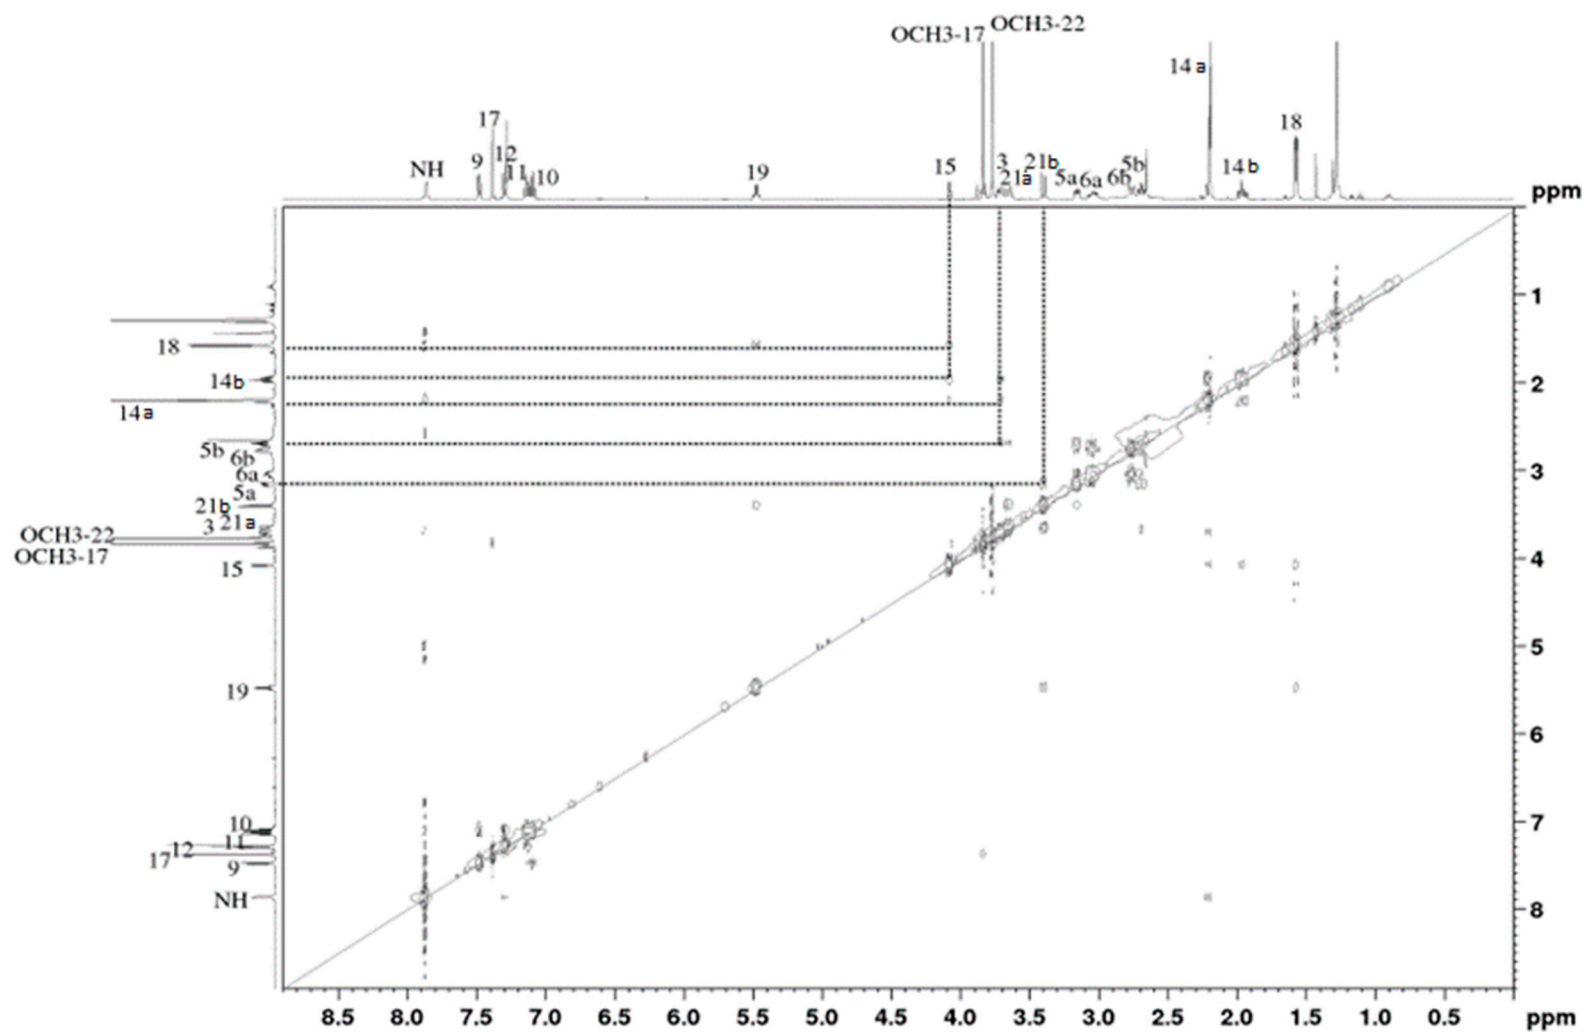

**Figure S17:** NOESY spectrum of compound (2) (CDCl<sub>3</sub>, 500 MHz).



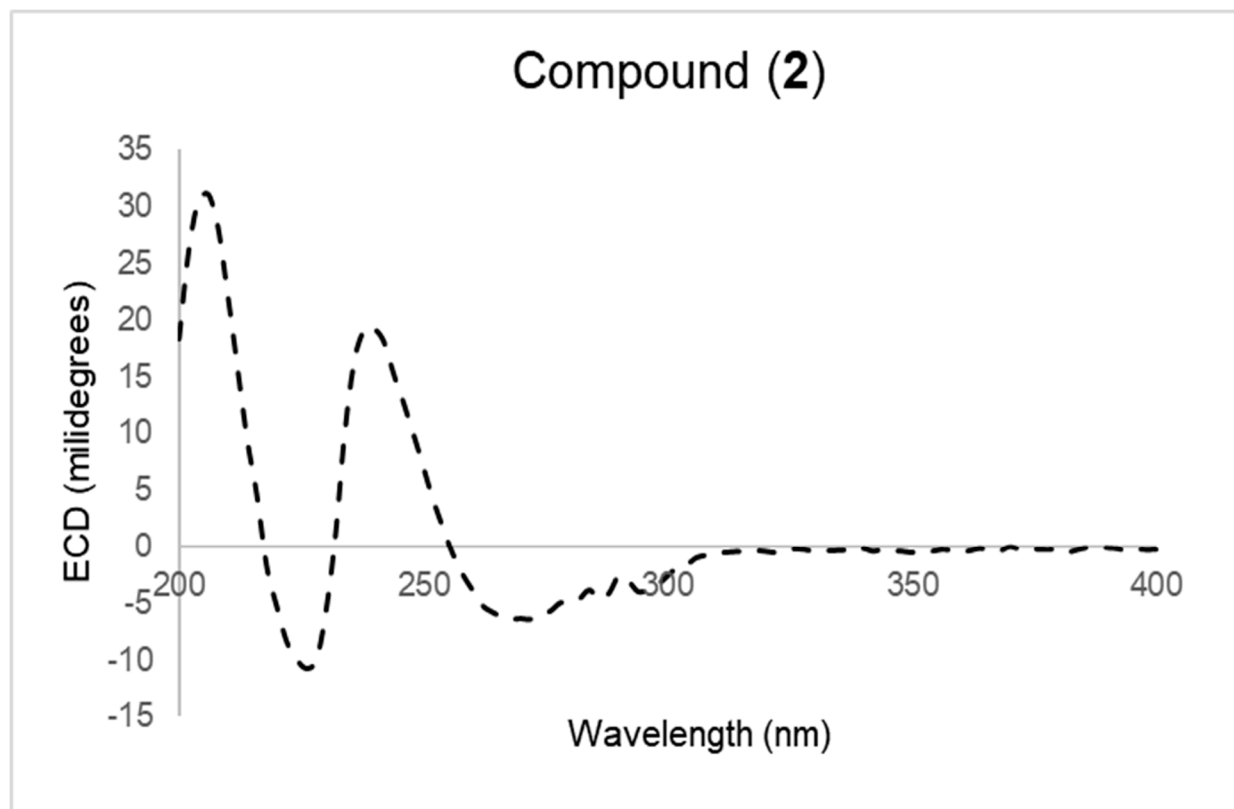

**Figure S18:** ECD spectrum of compound (2) (MeOH, 0.2 mg/mL).

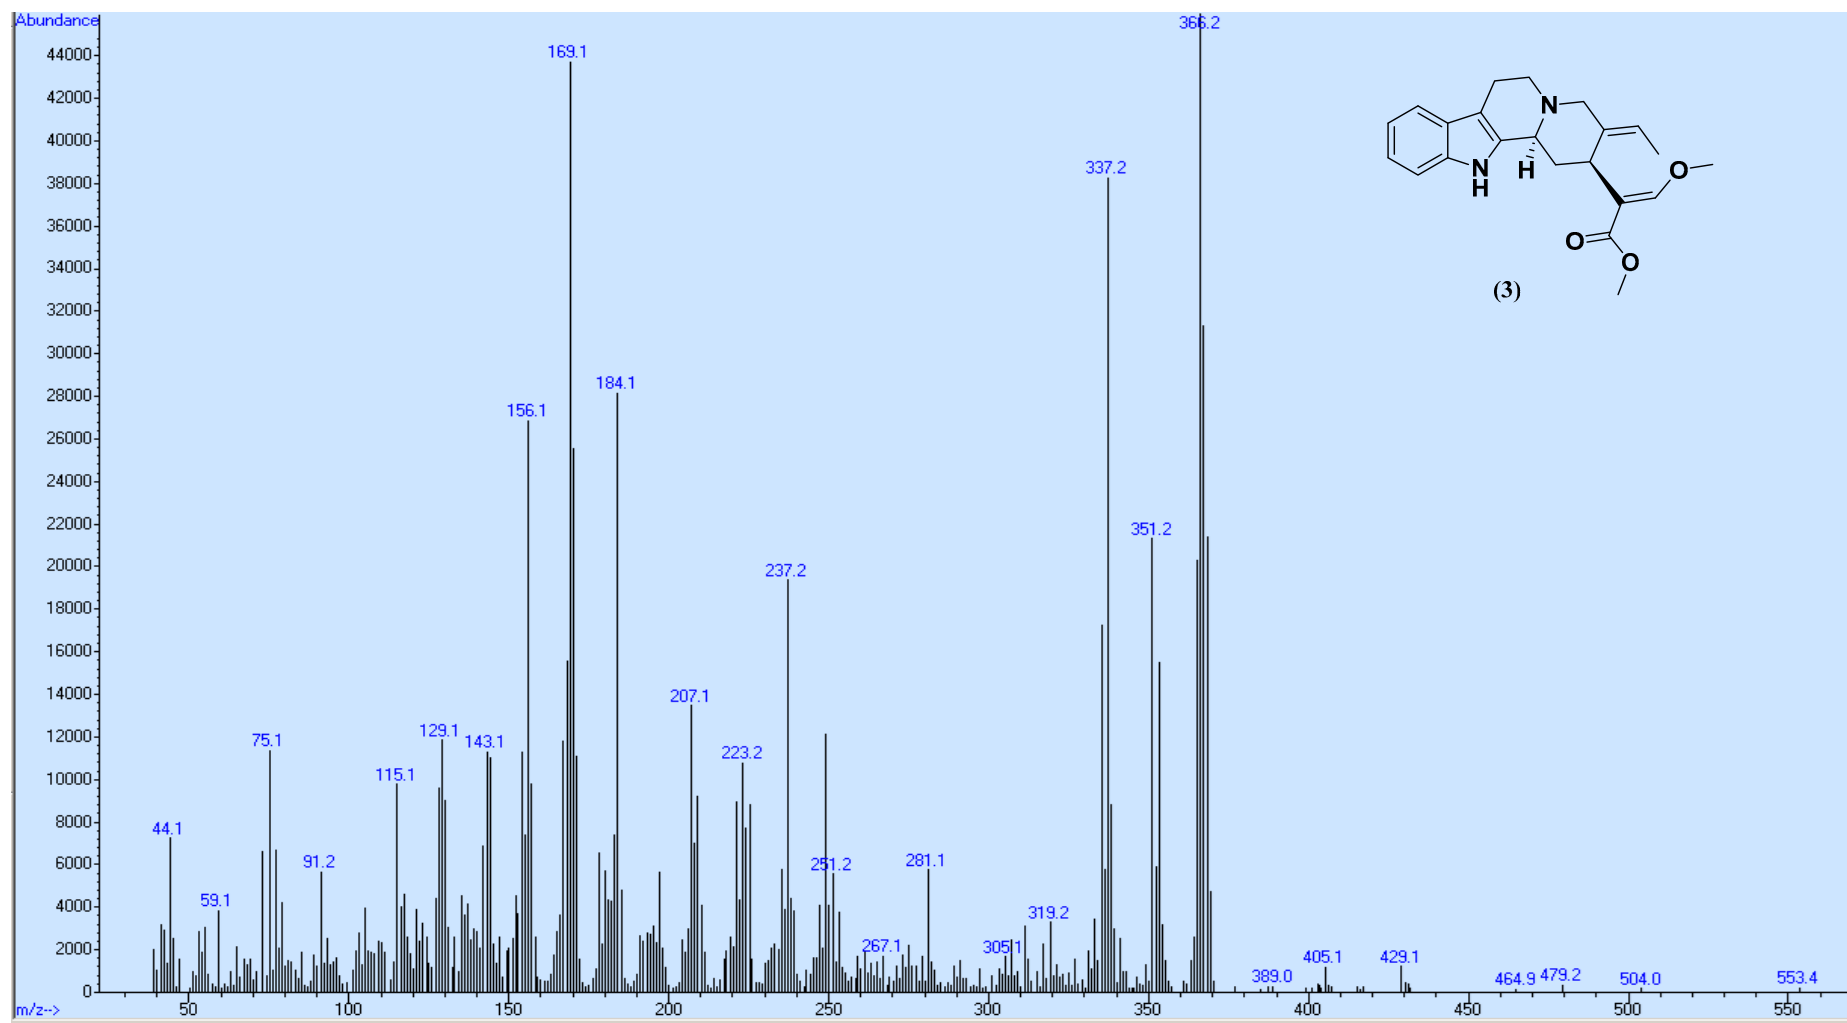

**Figure S19:** GC-EI-MS spectrum of compound (3).

UA-1C-F2

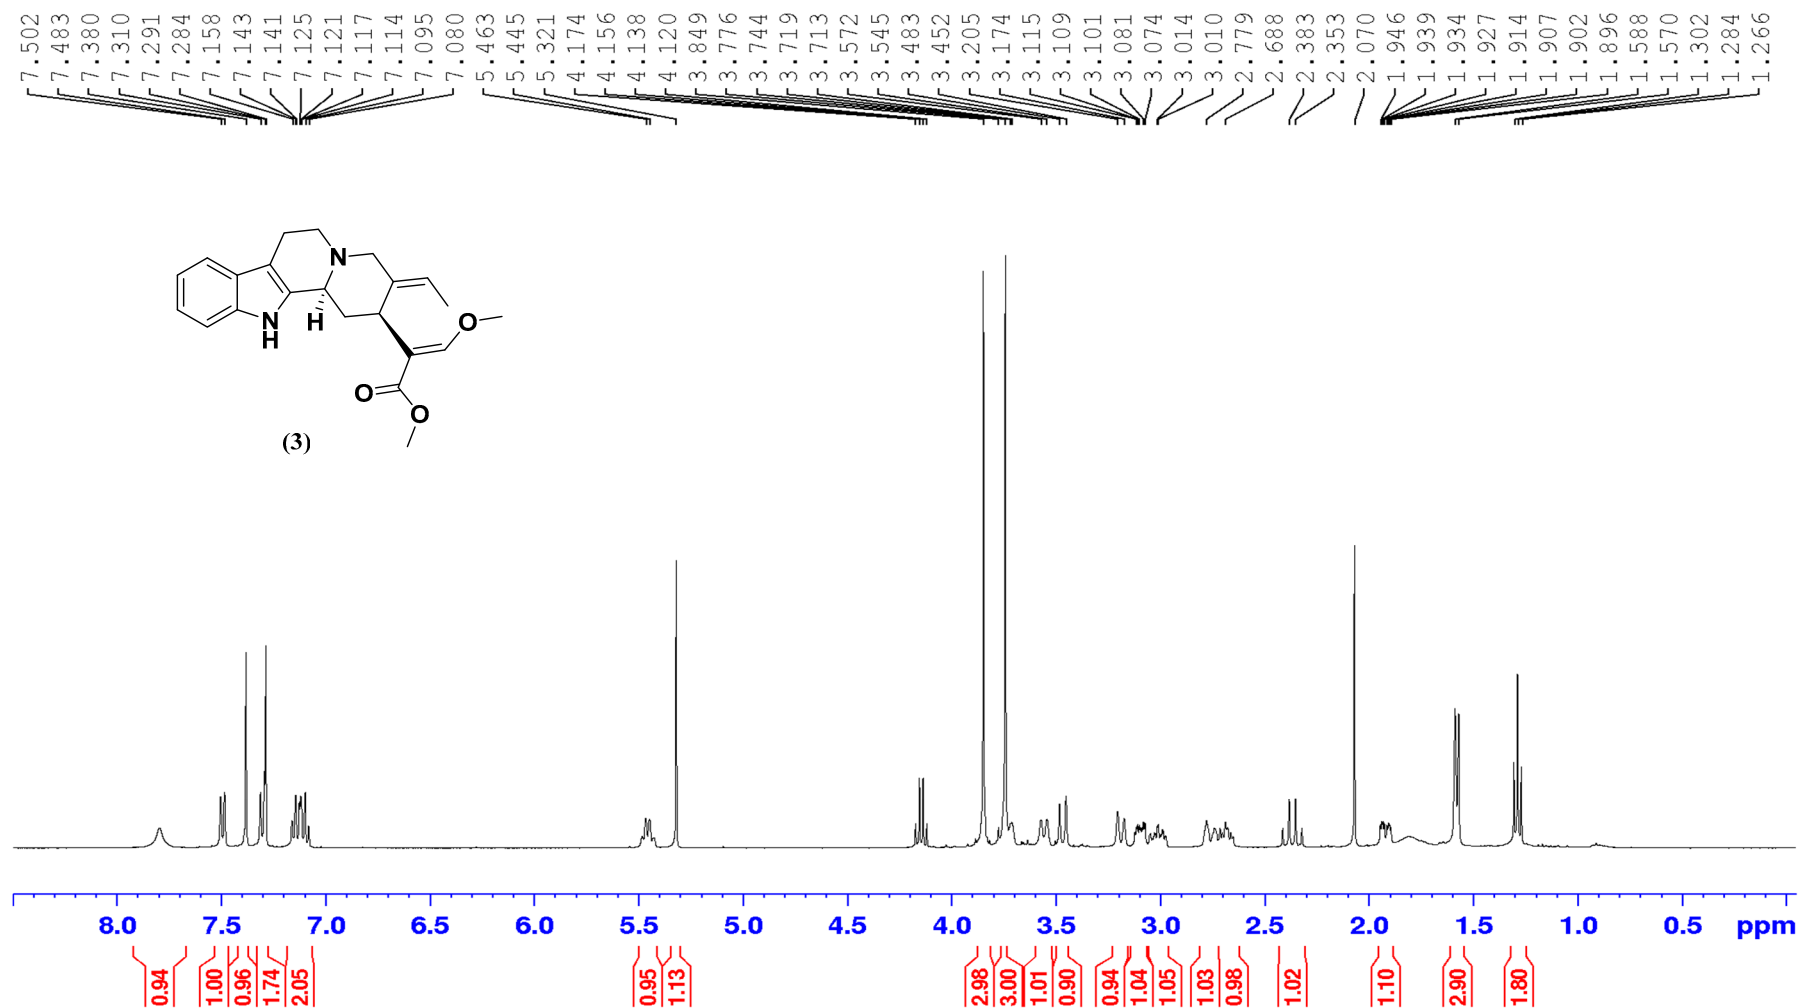

Figure S20: <sup>1</sup>H NMR spectrum of compound (3) (500 MHz, CDCl<sub>3</sub>).

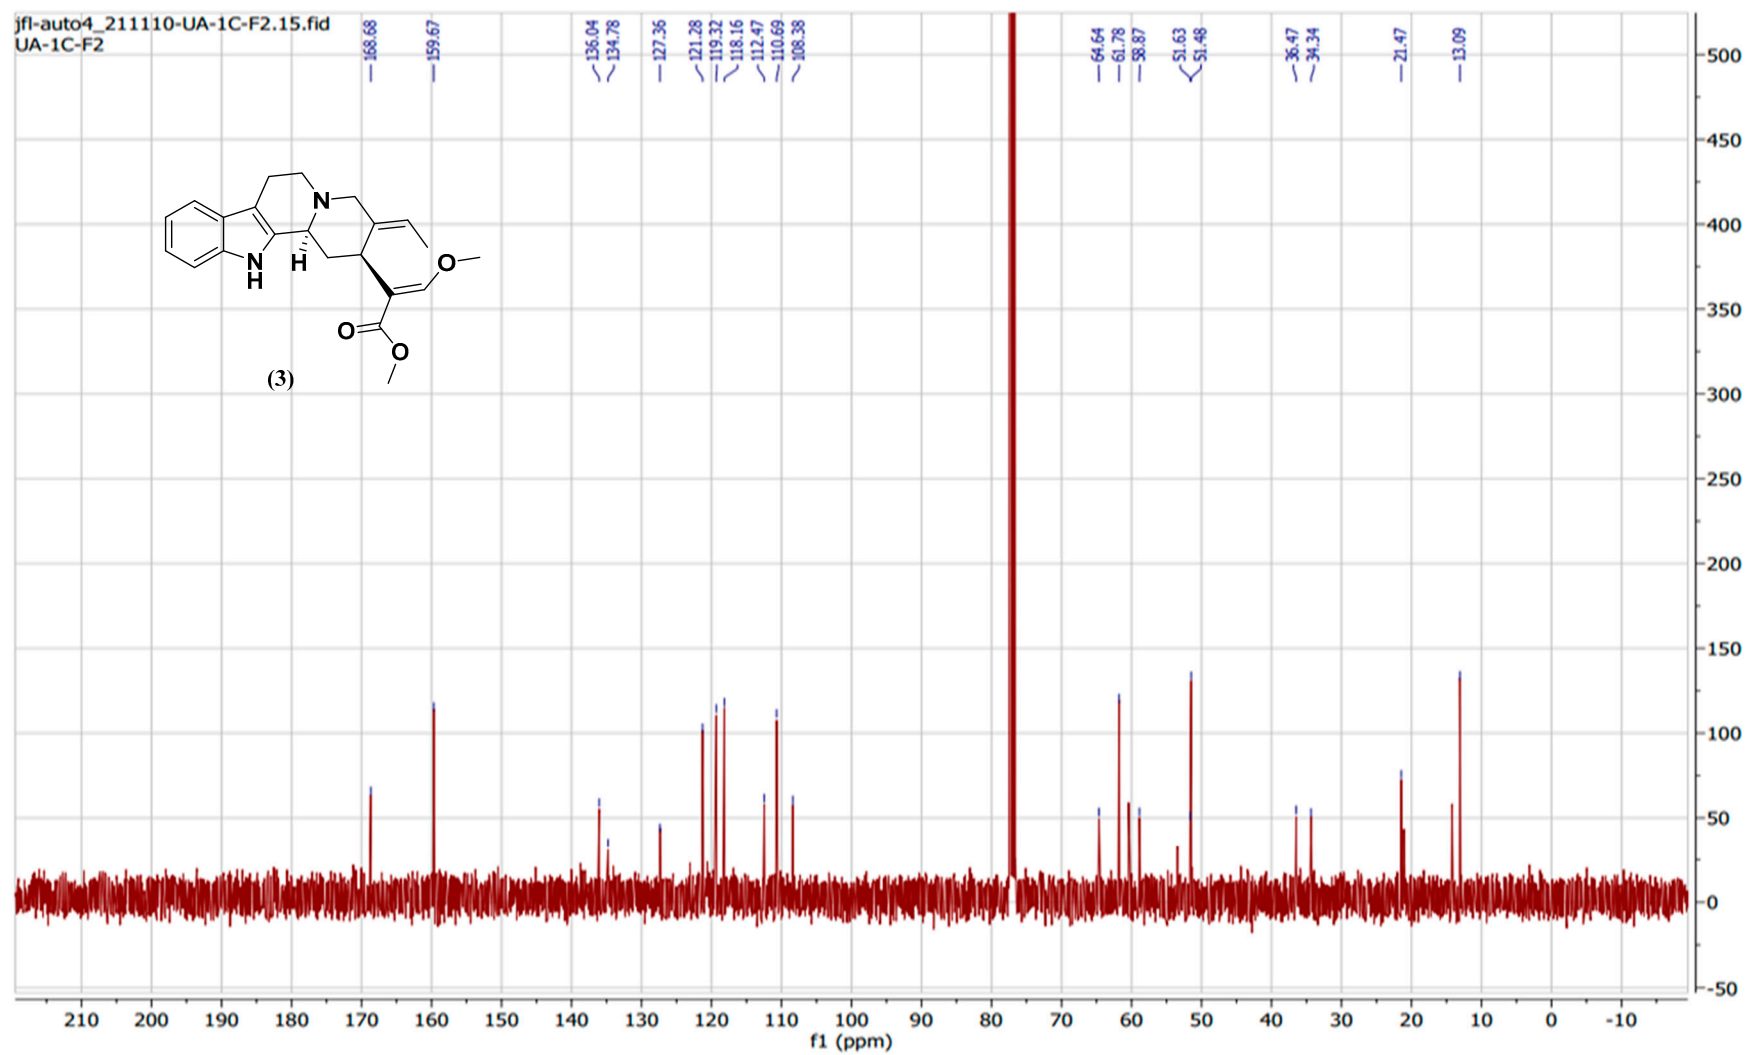

**Figure S21:**  $^1\text{H}$  NMR spectrum of compound (3) (500 MHz,  $\text{CDCl}_3$ ).

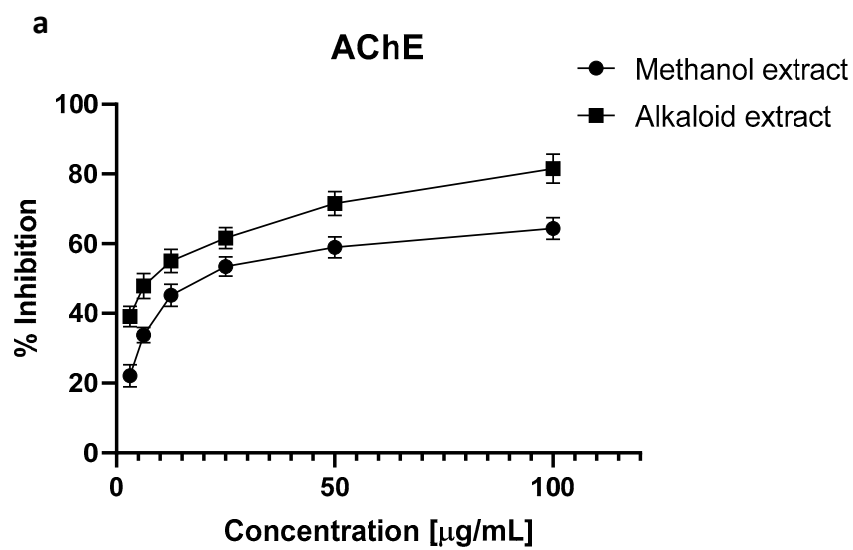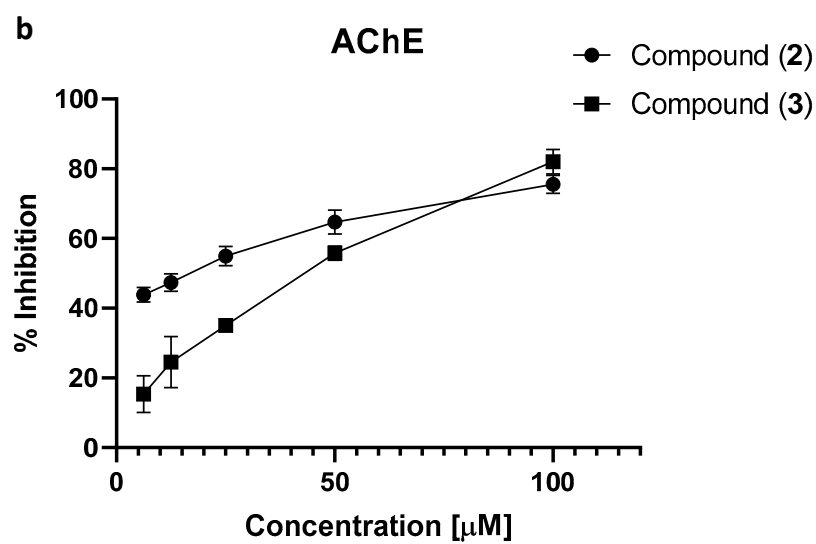

**Figure S22:** The dose-dependent curve of (a) methanol and alkaloid extracts and (b) compounds (2) & (3) against acetylcholinesterase (AChE).

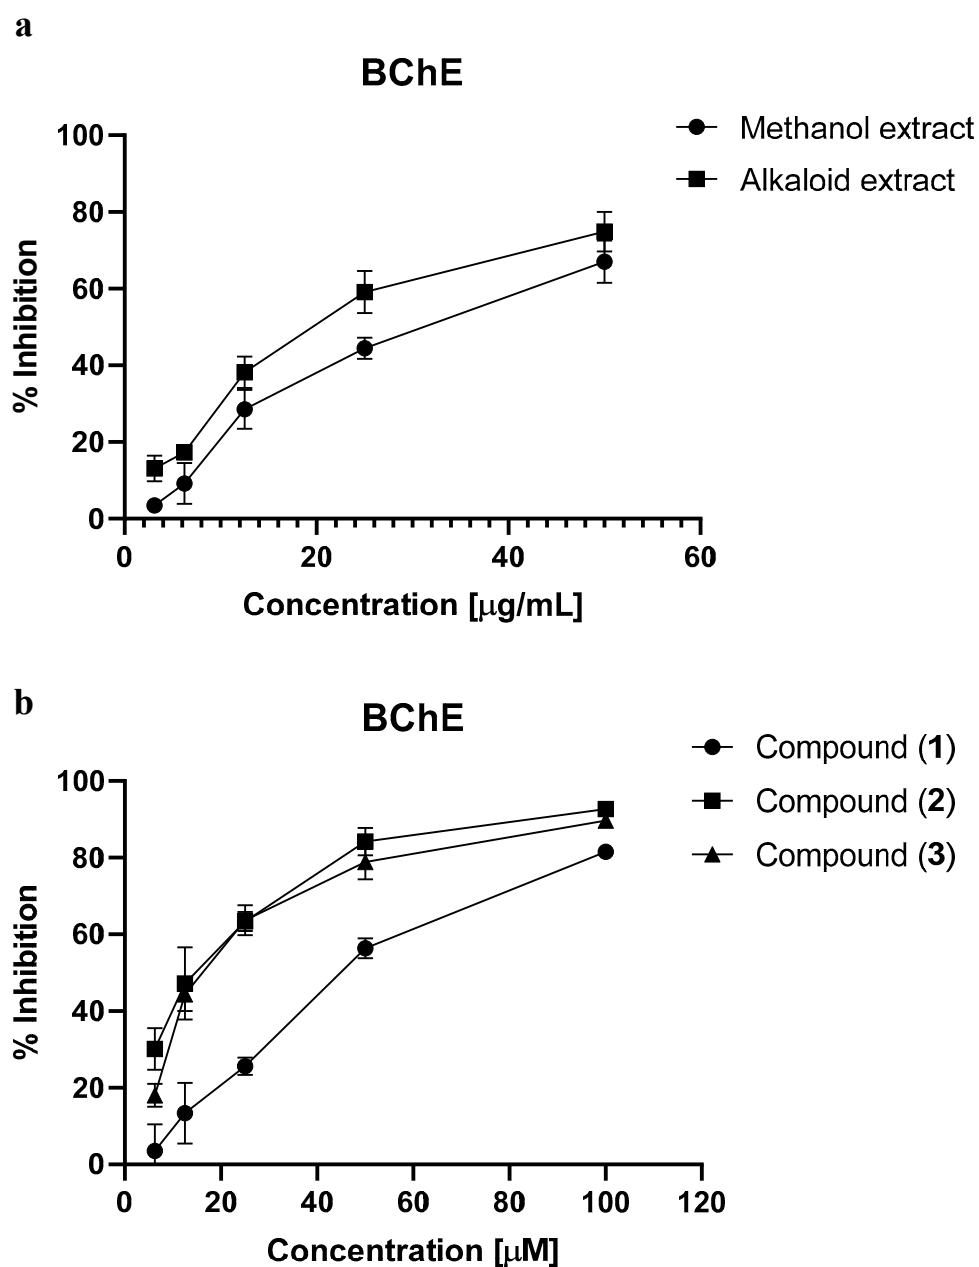

**Figure S23:** The dose-dependent curve of (a) methanol and alkaloid extracts, and (b) compound 1 – 3 against butyrylcholinesterase (BChE).

**Table S1:** 1D NMR data of compound (**2**).

| Experimental         |                                    |                            | Literature<br>(Matsuo et al., 2011) |                            |
|----------------------|------------------------------------|----------------------------|-------------------------------------|----------------------------|
| Position             | $\delta_{\text{H}}$ (n, <i>J</i> ) | $\delta_{\text{C}}$ , type | $\delta_{\text{H}}$ (n, <i>J</i> )  | $\delta_{\text{C}}$ , type |
| NH                   | 7.86 s (1H)                        | -                          | 7.71 s (1H)                         | -                          |
| 2                    | -                                  | 134.7, C                   | -                                   | 134.8, C                   |
| 3                    | 3.72 br d (1H, 12.1)               | 56.0, CH                   | 3.69 dd (1H, 12.0, 2.0)             | 56.0, CH                   |
| 5a                   | 3.14 dd (1H, 11.1, 4.6)            | 52.5, CH <sub>2</sub>      | 3.10 dd (1H, 11.0, 5.5)             | 52.5, CH <sub>2</sub>      |
| 5b                   | 2.66 ddd (1H, 11.5, 4.3)           | 52.5, CH <sub>2</sub>      | 2.65 ddd (1H, 11.0, 4.2)            | 52.5, CH <sub>2</sub>      |
| 6a                   | 3.04 m (1H)                        | 21.3, CH <sub>2</sub>      | 3.00 m (1H)                         | 21.4, CH <sub>2</sub>      |
| 6b                   | 2.76 br d (1H, 15.1)               | 21.3, CH <sub>2</sub>      | 2.73 br d (1H, 15.0)                | 21.4, CH <sub>2</sub>      |
| 7                    | -                                  | 108.4, C                   | -                                   | 108.3, C                   |
| 8                    | -                                  | 127.4, C                   | -                                   | 127.3, C                   |
| 9                    | 7.48 d (1H, 7.2)                   | 118.1, CH                  | 7.45 d (1H, 7.2)                    | 118, CH                    |
| 10                   | 7.08 td (1H, 7.2, 1.0)             | 119.3, CH                  | 7.07 td (1H, 7.2, 1.0)              | 119.2, CH                  |
| 11                   | 7.12 td (1H, 7.2, 1.0)             | 121.3, CH                  | 7.11 td (1H, 7.2, 1.0)              | 121.1, CH                  |
| 12                   | 7.29 d (1H, 7.2)                   | 110.7, CH                  | 7.28 d (1H, 7.2)                    | 110.7, CH                  |
| 13                   | -                                  | 136.1, C                   | -                                   | 136, C                     |
| 14a                  | 2.19 br d (1H, 13.5)               | 35.5, CH <sub>2</sub>      | 2.19 br d (1H, 13.4)                | 35.5, CH <sub>2</sub>      |
| 14b                  | 1.93 m (1H)                        | 35.5, CH <sub>2</sub>      | 1.90 ddd (1H, 13.4, 12.0, 7.2)      | 35.5, CH <sub>2</sub>      |
| 15                   | 4.07 d (1H, 7.0)                   | 30.9, CH                   | 4.05 d (1H, 7.2)                    | 30.9, CH                   |
| 16                   | -                                  | 112.3, C                   | -                                   | 112.3, C                   |
| 17                   | 7.39 s (1H)                        | 158.9, CH                  | 7.36 s (1H)                         | 158.8, CH                  |
| 18                   | 1.56 dd (3H, 6.8, 1.8)             | 12.9, CH <sub>3</sub>      | 1.55 dd (1H, 6.8, 1.7)              | 12.8, CH <sub>3</sub>      |
| 19                   | 5.47 q (1H, 6.7)                   | 122.6, CH                  | 5.45 q (1H, 6.8)                    | 122.5, CH                  |
| 20                   | -                                  | 134.2, C                   | -                                   | 134.2, C                   |
| 21a                  | 3.63 br d (1H, 12.8)               | 61.6, CH <sub>2</sub>      | 3.62 br d (1H, 13.2)                | 61.7, CH <sub>2</sub>      |
| 21b                  | 3.39 br d (1H, 12.8)               | 61.6, CH <sub>2</sub>      | 3.35 br d (1H, 13.2)                | 61.7, CH <sub>2</sub>      |
| 22                   | -                                  | 168.9, C                   | -                                   | 168.8, C                   |
| OCH <sub>3</sub> -22 | 3.77 s (3H)                        | 51.5, CH <sub>3</sub>      | 3.73 s (3H)                         | 51.4, CH <sub>3</sub>      |
| OCH <sub>3</sub> -17 | 3.84 s (3H)                        | 61.6, CH <sub>3</sub>      | 3.82 s (3H)                         | 61.5, CH <sub>3</sub>      |

$\delta$ =chemical shift (ppm); *J* = coupling constant (Hz); n = no. of proton

**Table S2:** 1D NMR data of compound (**3**).

| Position             | Experimental                                    |                                         | Literature<br>(Takayama et al., 1992) [22]      |                                         |
|----------------------|-------------------------------------------------|-----------------------------------------|-------------------------------------------------|-----------------------------------------|
|                      | $\delta_{\text{H}}$ (n, <i>J</i> )<br>(400 MHz) | $\delta_{\text{C}}$ , type<br>(100 MHz) | $\delta_{\text{H}}$ (n, <i>J</i> )<br>(500 MHz) | $\delta_{\text{C}}$ , type<br>(125 MHz) |
| NH                   | 7.80 br s (1H)                                  | -                                       | 7.79 br s (1H)                                  | -                                       |
| 2                    | -                                               | 134.8, C                                | -                                               | 134.8, C                                |
| 3                    | 3.56 br d (1H, 11.2)                            | 58.9, CH                                | 3.52 dd (1H, 11.3, 2.0)                         | 58.8, CH                                |
| 5a                   | 3.09 m (1H)                                     | 51.5, CH <sub>2</sub>                   | 3.07 ddd (1H, 11.1, 5.4, 3.2)                   | 51.6, CH <sub>2</sub>                   |
| 5b                   | 2.68 ddd (1H, 11.0, 10.0, 4.7)                  | 51.5, CH <sub>2</sub>                   | 2.65 ddd (1H, 11.1, 9.6, 4.6)                   | 51.6, CH <sub>2</sub>                   |
| 6a                   | 3.00 m (1H)                                     | 21.5, CH <sub>2</sub>                   | 2.98 ddd (1H, 15.0, 9.6, 5.4, 2.0)              | 21.5, CH <sub>2</sub>                   |
| 6b                   | 2.76 br d (1H, 15.0)                            | 21.5, CH <sub>2</sub>                   | 2.73 br d (1H, 15.0)                            | 21.5, CH <sub>2</sub>                   |
| 7                    | -                                               | 108.4, C                                | -                                               | 108.3, C                                |
| 8                    | -                                               | 127.4, C                                | -                                               | 127.3, C                                |
| 9                    | 7.49 d (1H, 7.7)                                | 118.2, CH                               | 7.46 dd (1H, 7.8, 1.2)                          | 118.1, CH                               |
| 10                   | 7.10 td (1H, 7.7, 1.2)                          | 119.3, CH                               | 7.07 td (1H, 7.8, 1.2)                          | 119.3, CH                               |
| 11                   | 7.14 td (1H, 7.7, 1.2)                          | 121.3, CH                               | 7.11 td (1H, 7.8, 1.2)                          | 121.1, CH                               |
| 12                   | 7.30 d (1H, 7.7)                                | 110.7, CH                               | 7.26 dd (1H, 7.8, 1.2)                          | 110.7, CH                               |
| 13                   | -                                               | 136.0, C                                | -                                               | 136.0, C                                |
| 14a                  | 2.37 q (1H, 12.5)                               | 34.3, CH <sub>2</sub>                   | 2.33 ddd (1H, 12.5, 12.5, 11.3)                 | 34.3, CH <sub>2</sub>                   |
| 14b                  | 1.92 dq (1H, 12.6, 2.2)                         | 34.3, CH <sub>2</sub>                   | 1.89 ddd (1H, 12.5, 5.0, 2.0)                   | 34.3, CH <sub>2</sub>                   |
| 15                   | 3.73 (1H, overlap)                              | 36.5, CH                                | 3.70 d (1H, 12.5)                               | 36.4, CH                                |
| 16                   | -                                               | 112.5, C                                | -                                               | 112.5, C                                |
| 17                   | 7.38 s (1H)                                     | 159.7, CH                               | 7.35 s (1H)                                     | 159.6, CH                               |
| 18                   | 1.58 br d (3H, 7.12)                            | 13.1, CH <sub>3</sub>                   | 1.55 dt (1H, 7.2, 1.4)                          | 13.1, CH <sub>3</sub>                   |
| 19                   | 5.45 q (1H, 7.2)                                | 120.5, CH                               | 5.42 br q (1H, 7.2)                             | 120.4, CH                               |
| 20                   | -                                               | 133.7, C                                | -                                               | 134.0, C                                |
| 21a                  | 3.47 d (1H, 12.5)                               | 64.6, CH <sub>2</sub>                   | 3.44 d (1H, 12.5)                               | 64.6, CH <sub>2</sub>                   |
| 21b                  | 3.19 br d (1H, 12.5)                            | 64.6, CH <sub>2</sub>                   | 3.16 dd (1H, 12.5, 1.0)                         | 64.6, CH <sub>2</sub>                   |
| 22                   | -                                               | 168.7, C                                | -                                               | 168.7, C                                |
| OCH <sub>3</sub> -22 | 3.75 s (3H)                                     | 51.6, CH <sub>3</sub>                   | 3.72 s (3H)                                     | 51.4, CH <sub>3</sub>                   |
| OCH <sub>3</sub> -17 | 3.85 s (3H)                                     | 61.8, CH <sub>3</sub>                   | 3.82 s (3H)                                     | 61.7, CH <sub>3</sub>                   |

$\delta$ = chemical shift (ppm); *J* = coupling constant (Hz); n = no. of proton
